# ***Gli3* controls the onset of cortical neurogenesis by regulating the radial glial cell cycle through *Cdk6* expression**

Kerstin Hasenpusch-Theil<sup>1</sup>, Stephen West<sup>1</sup>, Alexandra Kelman<sup>1</sup>, Zrinko Kozic<sup>1</sup>, Sophie Horrocks<sup>1</sup>, Andrew P. McMahon<sup>2</sup>, David J. Price<sup>1</sup>, John O. Mason<sup>1</sup>, and Thomas Theil<sup>1,3</sup>

<sup>1</sup>Centre for Discovery Brain Sciences, Hugh Robson Building, University of Edinburgh, Edinburgh, EH8 9XD, United Kingdom

<sup>2</sup>Department of Stem Cell Biology and Regenerative Medicine, Eli and Edythe Broad-CIRM Center for Regenerative Medicine and Stem Cell Research, W.M. Keck School of Medicine, University of Southern California, Los Angeles, CA 90033, USA

<sup>3</sup>Author for correspondence (email: [thomas.theil@ed.ac.uk](mailto:thomas.theil@ed.ac.uk))

**Key words:** *Gli3*; neurogenesis; cell cycle; *Cdk6*

## SUMMARY STATEMENT

We identified a novel role for Gli3 in controlling the cell cycle of radial glial cells and thereby neuron generation and growth of the cerebral cortex.

## ABSTRACT

The cerebral cortex contains an enormous number of neurons which underlies its ability to perform highly complex neural tasks. Understanding how these neurons develop at the correct time and place and in accurate numbers constitutes a major challenge. Here, we demonstrate a novel role for *Gli3*, a key regulator of cortical development, in cortical neurogenesis. We show that the onset of neuron formation is delayed in *Gli3* conditional mutants. Gene expression profiling and cell cycle measurements indicated that shortening of the G1 and S phases in radial glial cells precedes this delay. Reduced G1 length correlates with an up-regulation of the cyclin dependent kinase *Cdk6* which is directly regulated by *Gli3*. Moreover, pharmacological interference with Cdk6 function rescues the delayed neurogenesis in *Gli3* mutant embryos. Overall, our data indicate that *Gli3* controls the onset of cortical neurogenesis by determining the levels of *Cdk6* expression thereby regulating neuronal output and cortical size.

## INTRODUCTION

The ordered formation of neurons in sufficient numbers and at the correct time and place underlies the functioning of the cerebral cortex and its ability to perform highly complex neural tasks and to confer humans with their unique cognitive capabilities. Central to generating appropriate numbers of neurons are cortical stem and progenitor cells and the control of their proliferation and differentiation rates. Changes in these parameters can have profound effects on cortical size and have been proposed to underlie cortical malformations in human disease as well as the expansion of the human cerebral cortex during evolution (Florio and Huttner, 2014). During murine corticogenesis, there are two major types of stem and progenitor cells: radial glial cells (RGCs) and basal progenitors (BPs) which can be characterized by the expression of the Pax6 and Tbr2 transcription factors, respectively (Englund et al., 2005; Götz et al., 1998; Warren et al., 1999). RGCs extend apical and basal processes and present with an apico-basal polarity (Götz and Huttner, 2005). They divide at the apical surface of the ventricular zone to undergo either symmetric proliferative divisions to expand the progenitor pool or asymmetric self-renewing divisions to produce an RGC daughter cell and either a neuron or a BP (Götz and Huttner, 2005). BPs are born from RGCs, have no apical contact and settle in a more basal position to form the subventricular zone. Most BPs divide directly into two neurons, whereas the remainder undergo one round of symmetric proliferative division before differentiating into two neurons (Haubensak et al., 2004; Miyata et al., 2004; Noctor et al., 2004).

The switch from symmetric proliferative divisions to asymmetric divisions in RGCs is crucial to determine neuron numbers and cortical size and is controlled by cell extrinsic as well as cell intrinsic mechanisms. Fgf10 and retinoic acid are produced by neuroepithelial cells and by the meninges, respectively, and control the transition between these division modes and thereby regulate cortical neuron formation (Haushalter et al., 2017; Sahara and O'Leary, 2009; Siegenthaler et al., 2009), whereas Notch/Delta signalling between neural progenitors is essential for progenitor self-renewal by regulating the activity of the Hes transcription factors (Kageyama et al., 2008; Pierfelice et al., 2011). Moreover, there is increasing evidence for a pivotal role of the cell cycle as a cell-intrinsic control mechanism to determine the balance between RGC proliferation and differentiation. In particular, the length of the G1 phase correlates with the neurogenic fate of cortical cell divisions. Early during corticogenesis, cortical progenitors have a shorter G1 and undergo proliferative divisions while G1 becomes longer for neurogenic divisions at later stages (Miyama et al., 1997). Moreover, G1 lengthening alone is sufficient to induce neurogenesis while shortening G1 inhibits neuron formation (Lange et al., 2009; Pilaz et al., 2009). While these studies clearly demonstrate the importance of the cell cycle in regulating the switch from proliferative to neurogenic divisions in radial glial cells, it remains largely unexplored how cell cycle length itself is controlled at the onset of cortical neurogenesis.

The evolutionarily highly conserved zinc finger transcription factor Gli3 is well positioned to combine roles in early cortical development with the timing of neuron formation. *Gli3* is essential for patterning the telencephalon (Theil et al., 1999; Tole et al., 2000) by repressing Shh signalling and by also acting in a Shh independent manner (Rash and Grove, 2007). Recent single cell mRNA-seq experiments identified *Gli3* as an RGC specific marker in human cortex (Pollen et al., 2015; Pollen et al., 2014). *Gli3* has been implicated in murine cortical stem cell development after mid-corticogenesis when it regulates cortical growth (Palma and Ruiz i Altaba, 2004; Wang et al., 2011). Gli3 also helps to establish the adult neurogenic niche by repressing *Il6st* and *Numb* gene expression (Wang et al., 2014). Strikingly, the earliest born cortical neurons are severely reduced and/or completely lost in the *Gli3* mutant forebrain (Magnani et al., 2010; Magnani et al., 2013; Theil, 2005) strongly suggesting a role in controlling the transition from symmetric to asymmetric division in RGCs but the underlying mechanisms remain unexplored. Here, we demonstrate that conditional inactivation of *Gli3* in cortical RGCs leads to a delay in cortical neuron formation coinciding with an increase in cortex size and a reduced proportion of deep layer neurons. Gene expression profiling indicates that altered expression of cell cycle genes precedes this neurogenesis defect. Indeed, the cell cycle length of *Gli3* mutant RGCs is shortened as a result of reduced lengths of the G1 and S phases. Mechanistically, Gli3 binds to the promoter of the *Cdk6* gene, a key regulator of G1 phase length (Choi and Anders, 2014), in vitro and in vivo and represses *Cdk6* transcription. Interfering with *Cdk6* activity rescues the delayed neurogenesis in *Gli3* conditional mutants. Taken together, these findings establish *Gli3* as a novel regulator of the RGC cell cycle and show that *Gli3* regulates cell cycle length and thereby cortical neurogenesis by controlling *Cdk6* expression.

## RESULTS

### Cortical neurogenesis is delayed in *Gli3* mutant embryos

To address which cortical progenitor cell types express *Gli3* protein, we performed *Gli3* double immunofluorescence staining with Pax6 and Tbr2 as markers for radial glial cells and basal progenitors, respectively, on sections of the E12.5 cortex. This analysis revealed that *Gli3* is expressed in Pax6+ progenitors. Some Tbr2+ cells, mainly located deep within the ventricular zone, also express *Gli3* whereas basal progenitors at the upper side of the ventricular zone express little or no *Gli3* protein (Fig. S1). These findings indicate that *Gli3* is predominately expressed in radial glial cells and becomes down-regulated in basal progenitors as has been described for Pax6 (Englund et al., 2005).

Given its expression in radial glial cells *Gli3* could regulate their proliferation or their differentiation into basal progenitors and cortical projection neurons. To investigate such roles we made use of *Emx1Cre;Gli3<sup>fl/fl</sup>* (*Gli3<sup>ckO</sup>*) conditional mutants. In these embryos, *Gli3* is inactivated in the cortex in a gradient from medial to lateral with inactivation being completed medially by E11.5 with the onset of neurogenesis. In contrast, *Gli3* protein expression in the lateral neocortex is only lost by E12.5 when neurogenesis is already underway (Fig. S1). Moreover, E12.5 *Gli3<sup>ckO</sup>* embryos can easily be distinguished from control embryos by a prominent bulging of the rostral telencephalon suggesting a severe growth defect (Fig. S2). Coronal sections through the telencephalon revealed an elongation of the rostral midline and a thinner cortex with lower numbers of cells per unit of surface but no obvious defect in cortical patterning as described previously (Amaniti et al., 2013) (Figure 1A, B; Fig. S3). Given this growth defect, we focussed our analysis of RGC development on the rostromedial telencephalon of *Gli3<sup>ckO</sup>* embryos. We first determined the proportions of radial glial cells, basal progenitors and cortical neurons in this region in E11.5 and E12.5 *Gli3<sup>ckO</sup>* embryos, i.e. at the beginning of cortical neurogenesis. Double immunofluorescence staining for PCNA, a marker of proliferating cells (Hall et al., 1990), and the radial glial marker Pax6 revealed an increase in the proportion of radial glial cells in E11.5 and E12.5 *Gli3<sup>ckO</sup>* embryos (Fig. 1C-G). This rise coincided with a decreased proportion of proliferating basal progenitors and neurons at E11.5 as evidenced by Tbr2/PCNA and Tbr1/TO-PRO-3 double staining, respectively (Fig. 1H, I, L, M, N, Q). In contrast, the basal progenitor pool was increased by E12.5, while the proportion of neurons remained decreased (Fig. 1J, K, L, O, P, Q). Taken together, these findings indicate that the formation of basal progenitors and cortical neurons is delayed in *Gli3<sup>ckO</sup>* embryos suggesting that *Gli3* controls the timing of RGC differentiation into basal progenitor cells and neurons.

## Reduced cell cycle exit and decreased formation of deep layer neurons in *Gli3*<sup>ckO</sup> mutants

To determine whether reduced neuron numbers in *Gli3* mutants were due to increased neural progenitor proliferation, we performed double immunofluorescence experiments for PCNA and pHH3 which labels mitotic RGCs at the ventricular surface and dividing basal progenitors in abventricular positions. This analysis confirmed increased proportions of RGCs and basal progenitors undergoing mitosis in E11.5 *Gli3*<sup>ckO</sup> embryos (Fig. 2A, B, E, F). This effect is also maintained in E12.5 mutant basal progenitors but not in RGCs (Fig. 2C-F). We also investigated the possibility of altered cell cycle exit using BrdU pulse chase experiments. BrdU was given to pregnant mice 24 h before dissecting the embryos and PCNA staining was used to reveal all proliferating cells. This analysis showed that the fraction of cells leaving the cell cycle and differentiating into neurons (BrdU+/PCNA-) was significantly reduced in E12.5 *Gli3*<sup>ckO</sup> embryos consistent with the reduced proportions of neurons in these areas (Fig. 2G, H, K). This analysis suggests that alterations in proliferation and cell cycle exit underlie the changes in neuronal proportions in *Gli3* mutants.

Next, we investigated the consequences of this delayed cortical neurogenesis on cortical size and layer formation. We predicted that a delay in early neuron generation would result in an enlarged cortex and in reduced proportions of deep layer neurons. We first confirmed a reduction in the formation of early born neurons in the *Gli3*<sup>ckO</sup> cortex using a BrdU pulse labelling experiment where BrdU was injected into E12.5 pregnant dams and embryos were recovered at E17.5 (Fig. 2I-K). Next, we measured cortical surface area which was significantly increased in *Gli3*<sup>ckO</sup> brains (Fig. 3A-C). Measurements on coronal sections also revealed an enlarged ventricular surface and a thicker cortex in *Gli3*<sup>ckO</sup> mutants (Fig. S4). We also used immunofluorescence labelling for Tbr1 and Ctip2 to investigate the formation of layer VI and layer V neurons, respectively, whereas Satb2 served as a layer II-IV neuronal marker. To this end, the neocortex was subdivided into 10 bins and the proportions, distribution, and number of each neuronal subtype were determined. This analysis revealed a reduced number and proportion of early born Tbr1+ neurons (Fig. S5) which settled in a narrower band (Fig. 3D-F). This reduced size of the Tbr1+ layer coincided with a shift of Ctip2+ neurons to a deeper location (Fig. 3G-I). The proportion of Tbr1+Ctip2+ neurons mainly located in layer VI was also decreased (Fig. 3M-O) and birthdating analyses showed a delayed generation of Tbr1+ neurons in *Gli3*<sup>ckO</sup> mutants (Fig. 3P-U). In contrast, we observed an increase in the proportion and numbers of Satb2+ neurons (Fig. 3J-L) (Fig. S5). Taken together, these experiments led us to conclude that a reduced cell cycle exit at early neurogenesis led to an increased cortical size and to the reduced and delayed formation of Tbr1+ deep layer neurons in *Gli3*<sup>ckO</sup> mutants.

### ***Gli3* regulates the RGC cell cycle**

To investigate the molecular mechanisms by which *Gli3* regulates RGC differentiation we compared gene expression profiles in control and *Gli3<sup>ckO</sup>* embryos through mRNA sequencing (mRNA-seq). To this end, we dissected the rostromedial telencephalon from embryos at E11.5 when the delay in BP and neuron formation started and at E12.5 when BPs and neurons were formed. We found that 2515 and 458 genes were differentially regulated in *Gli3<sup>ckO</sup>* embryos compared to control embryos at E11.5 and E12.5, respectively ( $p < 0.05$ ) (Supplementary Table 3). Gene ontology (GO) analysis using Genomatix Software showed that differentially regulated genes are mostly involved in cell cycle regulation at E11.5 (GO terms: “mitotic cell cycle”, “cell cycle phases” and “G1/S transition”) and in neuronal differentiation at E12.5 (GO terms: “generation of neurons” and “neuronal differentiation”) (Fig. S6). Other regulated genes were involved in “DNA replication” and “nervous system development” at E11.5 and in “cell differentiation” and “forebrain development” at E12.5, consistent with known roles of *Gli3* in cortical development.

The above findings indicate that alterations in the cell cycle of RGCs precede and may underlie defects in neurogenesis in *Gli3<sup>ckO</sup>* cortical progenitors. To test this idea, we first determined total cell cycle length and that of individual cell cycle phases in control and *Gli3<sup>ckO</sup>* embryos. We used iododeoxyuridine (IdU) and bromodeoxyuridine (BrdU) double labelling to calculate total cell cycle and S phase times (Fig. 4A) (Martynoga et al., 2005; Nowakowski et al., 1989). In addition, we combined BrdU labelling with immunostaining for phosphohistone H3 (pHH3), an indicator of late G2 and M-phase, to determine G2 length (Fig. 4B). To this end, embryos were harvested at different time points after BrdU administration to identify when BrdU label appears in mitotic figures. M-phase length was investigated by analysing the proportion of progenitors that are in M-phase by pHH3 immunofluorescence compared to the total number of progenitors as revealed by PCNA staining (Fig. 4C). Finally, determining total cell cycle length and length of S, G2 and M phase allowed us to calculate the length of the G1-phase. These analyses revealed a shortening of the overall cell cycle in E11.5 *Gli3<sup>ckO</sup>* cortical progenitors coinciding with significantly shorter G1 and S-phases (Fig. 4D, Table 1 and Supplementary Table 4). In contrast, the cell cycle was elongated due to a lengthening of S-phase in E12.5 *Gli3<sup>ckO</sup>* embryos (Fig. 4D, Table 1 and Supplementary Table 4). Taken together, these analyses revealed altered cell cycle times in *Gli3<sup>ckO</sup>* mutants indicating that *Gli3* has an important role in controlling the length of the G1 and S-phases.



## Proportion of proliferating vs differentiating progenitors and changes in S phase length in *Gli3* mutants

Next, we investigated the causes for the changes in S phase length in *Gli3* mutants. As transcription during S-phase is limited, we addressed whether *Gli3* controls duration of S-phase by an indirect mechanism. Recently, it was shown that differentiating RGCs and BPs have a shorter S-phase than proliferative progenitors (Arai et al., 2011) raising the possibility that the shortening of S-phase in *Gli3* mutants is caused by a higher proportion of progenitors that are differentiating. These cells are characterized by *Btg2* (*Tis21*) expression (Iacopetti et al., 1999). Therefore, we generated *Gli3* mutants carrying a *Tis21*-GFP transgene (Haubensak et al., 2004). Double immunofluorescence for GFP and Pax6 revealed no statistically significant change in the proportion of differentiating RGCs in E11.5 *Gli3<sup>ckO</sup>* embryos but a decrease in E12.5 RGCs (Fig. S7). In contrast, the proportion of differentiating basal progenitors was slightly increased at E11.5 (Fig. S7). However, as basal progenitors only form a small proportion of the overall cortical progenitor population in the dorsomedial telencephalon, it is unlikely that this change contributes to the changes in S phase length in *Gli3<sup>ckO</sup>* mutants.

## *Gli3* directly represses *Cdk6* expression

As a next step we analysed the mechanisms by which *Gli3* regulates G1 duration. Among the cell cycle regulated genes, *Cyclin dependent kinase 6* (*Cdk6*) was the most highly upregulated gene in *Gli3<sup>ckO</sup>* embryos compared to controls (1.9 fold). *Cdk6* has a key role in controlling the transition between the G1 and S phases of the cell cycle and thereby determines the length of the G1-phase (Choi and Anders, 2014). The shorter G1-phase and its up-regulation in *Gli3* mutant cortical progenitors made *Cdk6* an interesting candidate acting downstream of *Gli3* to control the length of the G1-phase.

We first validated the *Cdk6* up-regulation by quantitative RT-PCR which confirmed a 1.95 and 1.51 fold up-regulation of *Cdk6* transcription in the rostromedial telencephalon of E11.5 and E12.5 *Gli3<sup>ckO</sup>* embryos, respectively, (Fig. 5A) consistent with our mRNA-seq data. Western blotting revealed a 1.35-fold up-regulation of the *Cdk6* protein in the dorsal telencephalon of E12.5 *Gli3<sup>ckO</sup>* embryos (Fig. 5B).

Next, we investigated the mechanism by which *Gli3* regulates *Cdk6* expression. The up-regulation of *Cdk6* in *Gli3<sup>ckO</sup>* mutants raises the possibility that *Gli3* binds to the *Cdk6* promoter and directly represses its transcription. Chromatin immunoprecipitation followed by deep sequencing identified several sites of *Gli3* occupancy in the *Cdk6* promoter region (Fig. 5C). Inspecting the promoter sequence revealed two potential, evolutionarily conserved *Gli3* binding sites. Using electromobility shift assays (EMSAs) we tested whether these sites can specifically bind a GST-*Gli3* protein containing the *Gli3* DNA binding domain. Incubation of GST-*Gli3* with oligonucleotides containing the *Gli* binding motif from the *Cdk6* promoter resulted in the formation of a slower migrating complex (Fig. 5D, E). Competition assays in the presence of various amounts of surplus



unlabelled wild-type oligonucleotide (competitor) resulted in progressively diminished binding of GST-Gli3 fusion protein with increasing amounts of competitor (Fig. 5D, E). However, complex formation was not competed by unlabelled *Cdk6* competitor oligonucleotide containing a GG to AT exchange (Fig. 5D, E) which abolishes Gli binding (Hepker et al., 1999) suggesting that Gli3 can specifically bind to sequences within the *Cdk6* promoter.

We further explored the functionality of the Gli3 binding sites using luciferase reporter assays in HEK293 cells. We cloned a 3.35 kb fragment immediately upstream of the *Cdk6* transcriptional start site into the promoterless luciferase reporter plasmid pGL4.10. Transfecting this construct into HEK293 cells resulted in the robust induction of luciferase activity (Fig. 5F). However, co-transfection of the *Cdk6* promoter/luciferase reporter construct with a Gli3 repressor expression plasmid (Persson et al., 2002) strongly reduced reporter gene expression. In contrast, mutations in the *Gli3* binding sites led to strong promoter activity (Fig. 5F) but levels were lower than for the wild-type construct and the promoter could still be repressed by co-transfection of a Gli3 repressor construct, potentially due to non-consensus Gli binding sites (Vokes et al., 2008). Taken together, these analyses demonstrate that Gli3 can specifically bind to sequences in the *Cdk6* promoter region and repress *Cdk6* promoter activity.

### **Interfering with *Cdk6* function restores the onset of neurogenesis in *Gli3*<sup>ckO</sup> mutants**

Next, we investigated a potential role of *Cdk6* as a Gli3 downstream target to control the timing of cortical neurogenesis. Activated *Cdk6* phosphorylates a number of proteins including the Retinoblastoma (Rb) proteins, which upon their hyperphosphorylation release the E2F transcription factors from inactive Rb/E2F complexes. E2F factors activate the G1-S transcriptional programme necessary for the progression into S-phase (Choi and Anders, 2014). Many of the genes characteristic of this programme including *Cdc6*, *Mcm2-7*, *Cdt1*, the E2Fs *E2F1* and *E2F2* and *Cyclin E1* and *Cyclin E2* are up-regulated in E11.5 *Gli3*<sup>ckO</sup> embryos. We also examined the phosphorylation status and the distribution of the Rb protein in *Gli3* mutant cortical progenitor cells. Cyclin/Cdk complexes are known to phosphorylate Rb at specific residues including Ser-780 (Ely et al., 2005; Kitagawa et al., 1996; Zarkowska and Mittnacht, 1997). In the rostromedial telencephalon of E11.5 and E12.5 embryos, most pRb-S780 positive cells were located at the ventricular surface where RGCs undergo mitosis before they enter G1-phase. In E11.5 *Gli3*<sup>ckO</sup> embryos, the proportion of pRb-S780 positive cells with respect to the total number of proliferative cells was increased but there was no significant change at E12.5 consistent with the shortening and elongation of the cell cycle at E11.5 and E12.5, respectively (Fig. 6A-E). Overall, these data indicate that the up-regulation of *Cdk6* in *Gli3* conditional mutants coincides with an increased phosphorylation of Rb at Ser780 in cortical progenitor cells and with an up-regulation of the G1-S transcriptional programme, suggesting that increased levels of *Cdk6* transcription prematurely drive progenitor cells into proliferation.

Finally, we directly tested whether the up-regulation of *Cdk6* underlies the delayed cortical neurogenesis in *Gli3<sup>ckO</sup>* embryos. To this end, we made use of Palbociclib which selectively inhibits Cdk4/6 with high specificity (Fry et al., 2004) and treated E10.5 pregnant mice either with lactate buffer as vehicle or with a single dose of 75mg Palbociclib/kg body weight before analysing embryos 24h later. This dose has previously been shown to reduce Cdk4/6 activity in embryos but not to completely block Cdk4/6 function (Fry et al., 2004). In control experiments, we first determined the effects of these treatments on the phosphorylation of Rb as a direct target of the Cdk4/6 kinases. Immunohistochemistry confirmed that the proportion of pRb-780 positive cells to the total number of PCNA+ proliferative cells was increased in *Gli3<sup>ckO</sup>* embryos treated with vehicle but did not differ between control and *Gli3<sup>ckO</sup>* embryos after Palbociclib treatment (Fig. 6F-J) indicating that this regimen resulted in the reduction of Cdk4/6 activity to control levels. Next, we analysed the formation of cortical neurons. Under control conditions, the proportion of neurons was reduced in *Gli3<sup>ckO</sup>* embryos consistent with our previous findings (Fig. 6K, L, O). In contrast, treating with Palbociclib restored the proportion of cortical neurons (Fig. 6M-O). We also tested whether Cdk6 inhibition at a later stage could also affect cortical neurogenesis in *Gli3<sup>ckO</sup>* embryos. To this end, we repeated the Palbociclib regimen with E11.5 pregnant mice which were also injected with a single dose of BrdU and determined the proportion of newly born Tbr1+BrdU+ neurons 24h later. This analysis revealed a slight increase in the proportion of newly formed neurons in *Gli3<sup>ckO</sup>* embryos under control conditions which, however, was not further increased after Palbociclib treatment (Fig. S8). Taken together, these findings strongly support the hypothesis that Cdk6 acts as a downstream target of Gli3 to control the onset of neuron formation in the cortex.

## DISCUSSION

Patterning and growth of the developing cerebral cortex have to be tightly coordinated to allow for the formation of appropriate types and numbers of neurons in time and space. Here we show that the *Gli3* transcription factor, which has previously been implicated as a key regulator of cortical patterning, has an additional role in controlling the onset of cortical neurogenesis. Cortex specific inactivation of *Gli3* resulted in the delayed formation of neurons. This defect is caused by a shortening of the cell cycle and in particular the lengths of G1 and S phases. Moreover, *Gli3* negatively regulates *Cdk6* expression levels and pharmacological interference with *Cdk6* function rescues the early delay in neurogenesis caused by cortical *Gli3* inactivation indicating that *Gli3* controls early cortical neurogenesis by regulating *Cdk6* expression levels.

Controlling the onset of neurogenesis represents a key requirement for forming a cortex of the appropriate size but how this control is achieved remains largely unknown. Here, we show that *Gli3* inactivation in cortical progenitors led to a delay in the formation of the earliest cortical neurons indicating a novel *Gli3* role in controlling the onset of neurogenesis. Interestingly, a previous study using *NestinCre;Gli3* conditional mutants identified a bias towards the formation of deep layer neurons at the expense of upper layer neurons (Wang et al., 2011). These different findings might be explained by differences in the timing of *Gli3* inactivation indicating temporal specific roles of *Gli3* at the onset of neurogenesis and at later neurogenic stages. A time dependent function in cortical neuron formation is also supported by our Palbociclib experiments.

Gene expression profiling led us to hypothesize that changes in cell cycle regulation underlie the delayed neurogenesis in the *Gli3* mutants. This idea is consistent with previous findings implicating the cell cycle as a pivotal regulator of cortical neurogenesis. In particular, the length of the G1 phase plays a major role. It increases during neurogenesis and artificial lengthening of G1 leads to premature neurogenesis (Calegari and Huttner, 2003; Lange et al., 2009; Pilaz et al., 2009). G1 length is mainly regulated by Cdk4/6/Cyclin D complexes which form a central node in a complex signalling network that promotes the G1-S transition (Choi and Anders, 2014). Activation of the Cdk4/6 kinase which is controlled by a multitude of signalling cues converging on the Cdk4/6 node leads to Rb hyperphosphorylation and subsequent release of the E2F transcription factors. These factors in turn activate the G1/S transcriptional programme which includes the expression of genes whose protein products are involved in the formation of the pre-recombination complex, DNA synthesis, and DNA repair (Choi and Anders, 2014).

We present multiple lines of evidence that *Gli3* controls the G1 length at the onset of neurogenesis by directly regulating *Cdk6* expression levels. Cortex specific inactivation of *Gli3* led to a shortening of G1 at the start of neurogenesis, to an up-regulation of *Cdk6* and to a concomitant activation of genes of the G1/S transcriptional programme. We also show that *Gli3* binds to the *Cdk6* promoter in vitro and in vivo as in the developing limb (Lopez-Rios et al., 2012; Vokes et al., 2008), and that its activity is repressed by *Gli3*. Finally, pharmacological interference with *Cdk6* kinase

activity using the highly specific inhibitor Palbociclib (Fry et al., 2004) specifically rescued the delayed start of neurogenesis in *Gli3*<sup>CKO</sup> embryos but had no effect at a later neurogenic stage. Taken together, these findings strongly implicate *Gli3* as a direct regulator of *Cdk6* and hence G1 length in radial glial cells. Interestingly, *Pax6* also controls *Cdk6* transcription (Mi et al., 2013) and essential *Pax6* binding sites are in close proximity to the *Gli3* binding sites (KHT and TT, unpublished) raising the possibility that both transcription factors might interact to control *Cdk6* expression levels in radial glial cells. Thus, in addition to posttranslational control of Cdk6 kinase activity, controlling *Cdk6* mRNA levels constitutes an important regulatory mechanism to fine tune the balance between proliferation and differentiation in cortical RGCs.

Though delayed, the switch from proliferative to neurogenic divisions eventually occurs in *Gli3* mutant radial glial cells. Despite *Cdk6* being still up-regulated in E12.5 *Gli3*<sup>CKO</sup> embryos, the cell cycle is significantly longer with no change in G1 phase length compared to control embryos. Also, S780 Rb phosphorylation is no longer increased. To promote G1 progression Rb phosphorylation must surpass a threshold (Blomen and Boonstra, 2007). This phosphorylation, however, depends on the sequential activity of Cdk4/6/Cyclin D and Cdk2/Cyclin E complexes which are negatively regulated by the Cdk inhibitors Cdkn1a, b and c (Lim and Kaldis, 2013). According to our gene expression profiling, these inhibitors are only down-regulated in E11.5 but not in E12.5 *Gli3*<sup>CKO</sup> embryos. Therefore, the activity levels of the Cdk complexes might not be sufficient to surpass the Rb phosphorylation threshold at E12.5 which might also explain the time limited effect of the Palbociclib treatment. The resulting prolonged cell cycle, a characteristic feature of differentiative divisions (Calegari et al., 2005; Caviness et al., 1995; Takahashi et al., 1995), could indicate a compensatory switch from self-renewing to neurogenic divisions corresponding with the increased neuron formation in the *Gli3* mutants at the later stage.

While evaluating the role of the G1 phase has gained much attention, recent work suggested the importance of S phase in cortical development. Cortical stem and progenitor cells shorten S phase on commitment to neuron production with the length of other cell cycle phases remaining unaltered (Arai et al., 2011). S phase length is also the most distinguishing feature between progenitor cell populations in ferret cortex (Turrero Garcia et al., 2016). A stronger requirement for DNA repair and replication fidelity in proliferative vs differentiating progenitors is thought to underlie a longer S phase suggesting that S phase is a key factor in maintaining the proliferative capacity of neural progenitor cells (Arai et al., 2011; Soufi and Dalton, 2016). Despite this pivotal role it remains largely unknown whether and how S phase duration is controlled by cortical transcription factors. Interestingly, *Gli3* cortical inactivation led to a shorter S phase in cortical progenitors. This change is not due to a shift in the proportion from proliferating to differentiating progenitors which have a shorter S phase (Arai et al., 2011) or due to a change in the proportions of apical and basal progenitors. Rather, S phase shortening is likely to reflect an intrinsic change of *Gli3* mutant radial glial cells as these cells make up the vast majority of progenitors in the E11.5 rostromedial telencephalon. The consequences of this S phase shortening are currently unclear but based on the above model, one

would predict an increase in neurogenesis which we observe one day later. Thus, the shorter S phase might be an early indicator of a switch towards asymmetric neurogenic divisions.

There are several mutually non-exclusive possibilities how *Gli3* could regulate S phase duration. First, the up-regulation of the G1/S programme may allow for faster progression through S-phase. Secondly, *Gli3* might directly control the expression of genes determining S phase length. Indeed, an up-regulation of *CyclinA2* which regulates S phase progression (Yam et al., 2002) in combination with a reduced expression of the cyclin inhibitors *Cdkn1a*, *b*, and *c* could induce RGCs to progress faster through S phase. Finally, S phase involves the control of DNA quality and repair and a large number of DNA repair genes are up-regulated (differentially expressed) in E11.5 *Gli3<sup>ckO</sup>* mutants. Interestingly, there is a large overlap in this set of *Gli3* regulated genes with E2F target genes (Ren et al., 2002). As *E2F* genes are up-regulated in *Gli3<sup>ckO</sup>* embryos, this finding raises the interesting possibility that *Gli3* regulates S phase length in RGCs by controlling the expression levels of the E2F transcription factors which integrate cell cycle progression with DNA repair and replication (Ren et al., 2002).

Taken together, our findings reveal that *Gli3* controls the onset of cortical neurogenesis by regulating *Cdk6* expression levels and G1 phase length. Besides identifying *Cdk6* as *Gli3*'s first target gene during corticogenesis, our results have major implications for cortical development in health as well as for human disease. Formation of the cerebral cortex requires a tight balance between proliferation and differentiation of radial glial cells to determine neuron numbers and eventually cortical size. A delayed onset of neurogenic divisions is predicted to lead to an increased number of radial units and to an overproduction of later born cortical neurons at the expense of early born neurons. These changes alter the size and laminar composition of the cortex as observed in *Gli3<sup>ckO</sup>* mutants which is likely to affect cortical cytoarchitecture and function. Moreover, prolonged proliferation of cortical progenitor cells could not only underlie the macrocephaly in Acrocallosal Syndrome patients who carry mutations in *GLI3* but also the agenesis of the corpus callosum in these patients (Bonatz et al., 1997; Elson et al., 2002; Philip et al., 1988; Schinzel, 1979). In *Gli3<sup>ckO</sup>* mutants, the rostral midline becomes elongated and eventually starts to fold with glial cells specifically forming at these folds but not in the rest of the cortex. The resulting ectopic glial fibres later interfere with midline crossing of callosal axons (Amaniti et al., 2013). Interestingly, such folds are still present in the cingulate cortex of *Gli3<sup>ckO</sup>* postnatal animals (Amaniti et al., 2013). Similar glial abnormalities have also been observed in ciliary mouse mutants with callosal malformation (Benadiba et al., 2012; Laclef et al., 2015) suggesting that proliferation defects might also contribute to the malformation of the corpus callosum in the wider group of ciliopathies. Taken together, these wider considerations emphasize *Gli3*'s importance in governing the balance between proliferation and differentiation in cortical development.

## MATERIAL AND METHODS

### Mice

All experimental work was carried out in accordance with the UK Animals (Scientific Procedures) Act 1986 and UK Home Office guidelines. All protocols were reviewed and approved by the named veterinary surgeons of the College of Medicine and Veterinary Medicine, the University of Edinburgh, prior to the commencement of experimental work. *Flag-Gli3*, *Emx1Cre* and *Gli3<sup>flox/flox</sup>* mouse lines have been described previously (Blaess et al., 2008; Gorski et al., 2002; Nishi et al., 2015). *Emx1Cre;Gli3<sup>flox/+</sup>* and *Gli3<sup>flox/flox</sup>* mice were interbred to generate *Gli3<sup>CKO</sup>* mutants. Embryonic (E) day 0.5 was assumed to start at midday of the day of vaginal plug discovery and *Gli3<sup>flox/flox</sup>*, *Gli3<sup>flox/+</sup>*, *Emx1Cre* and *Gli3<sup>flox/+</sup>* embryos were used as controls. *Gli3<sup>flox/flox</sup>* animals were interbred with *Tis21-GFP* animals to generate *Gli3<sup>flox/flox</sup>;Tis21<sup>GFP/GFP</sup>* mice. Double transgenic females were crossed with *Emx1Cre;Gli3<sup>flox/+</sup>* males to obtain *Emx1Cre;Gli3<sup>flox/flox</sup>;Tis21<sup>GFP/+</sup>* conditional embryos. Transgenic animals and embryos were genotyped as described (Blaess et al., 2008; Gorski et al., 2002; Haubensak et al., 2004; Maynard et al., 2002; Ueta et al., 2002). For each marker and each stage, 4-7 embryos were analysed.

For BrdU and IdU incorporation experiments, pregnant females were injected intraperitoneally with 100 mg of BrdU per g body weight. Palbociclib was administered orally by gavage at 75 mg/kg body weight in lactate buffer (50mM, pH4.0) and animals were killed 24 hrs later.

### Immunohistochemistry and histology

Immunohistochemical analysis on 12µm cryosections was performed as described previously (Theil, 2005) using antibodies against the following antigens: rabbit anti-BrdU (1:50, Abcam #ab6326), mouse anti-BrdU (1:50, Becton Dickinson #347580), rat anti-Ctip2 (1:1000, Abcam #18465), chick anti-GFP (1:1000, Abcam #13970), goat anti-Gli3 (1:200, R&D Systems #AF3690), rabbit anti-Pax6 (1:400, Biolegend #901301), mouse anti-PCNA (1:500, Abcam #29), rabbit anti-pHH3 (1:100, Millipore #06-570), rabbit anti-Phospho-Rb S780 (1:200, Cell Signaling #9307), mouse anti-Satb2 (1:200, Abcam #51502), rabbit anti-Tbr1 (1:400, Abcam #31940), rabbit anti-Tbr2 (1:1000, Abcam #23345). Primary antibodies for immunohistochemistry were detected with Alexa- or Cy2/3-conjugated fluorescent secondary antibodies. The Gli3 and Tbr1 signals were amplified using biotinylated secondary IgG antibodies (Gli3: rabbit anti-goat IgG; Tbr1: swine anti-rabbit IgG) (1:400, Becton Dickinson) followed by Alexa Fluor 488 or 568 Streptavidin (1:200, Invitrogen). For counter staining TO-PRO-3 (1:2000, Invitrogen) or DAPI (1:2000, Life Technologies) were used.



For measuring S-phase lengths and total cell cycle lengths, pregnant females received a single, intraperitoneal injection of IdU, followed by an injection of BrdU 90 min later. Embryos were collected 2 h after the initial injection. To determine G2 length, pregnant females were treated with a single dose of BrdU, embryos were harvested 60, 90 or 120 minutes after BrdU administration and the proportion of BrdU+/pHH3+ cells was determined for each time point. Measurements of M-phase length involved determining the proportion of pHH3+/PCNA+ cells compared to the total number of PCNA+ cells. To determine the generation of neurons by pulse-chase experiments, pregnant females were intraperitoneally injected with BrdU. Embryos were harvested 24 h later and stained for BrdU and PCNA. The fraction of cells that had left the cell cycle and differentiated into neurons was calculated by dividing the number of BrdU+ PCNA- cells by the total number of BrdU+ cells. Quantifications of the dorsal surface area of the cortical hemispheres was obtained by outlining the cortex on images of whole brains. To calculate the length of the ventricular surface and cortical thickness lines were drawn on images of DAPI stained coronal sections. Area and length measurements were done using Fiji software.

### **Western blot**

Protein was extracted from the rostromedial telencephalon of E12.5 wild-type and *Gli3*<sup>CKO</sup> embryos as described previously (Magnani et al., 2010). 30 µg protein lysates were subjected to gel electrophoresis on a 4–12% gradient NuPAGE®Bis-Tris gel (Life Technologies), and protein was transferred to a PVDF membrane, which was incubated with rabbit polyclonal anti-Cdk6 antibody (1:300; SantaCruz biotechnology) and mouse anti-GAPDH antibody (1:5000, Applied Biosystems). After incubating with anti-rabbit IgG IRDye800CW (1:15000, LI-COR Biosciences) and anti-mouse IgG Alexa Fluor 680 secondary antibodies (1:5000, Life Technologies), signal was detected using LI-COR's Odyssey Infrared Imaging System with Odyssey Software. Values for protein signal intensity were obtained using Image Studio Lite Version3.1. Cdk6 protein levels were compared between wild-type and mutant tissue using a paired t-test.

### **Electrophoretic mobility shift assays**

For the GST-Gli3Zf construct, the cDNA encoding the Gli3 DNA binding domain was PCR amplified and subcloned into the pGEX4-T3 vector using the *SaI* and *NotI* restriction enzyme sites. Oligonucleotides used for cloning are summarized in Supplementary Table 1. Electrophoretic mobility assays were performed with biotin labelled oligonucleotides from the *Cdk6* promoter and purified GST and GST-Gli3-Zf proteins as described previously (Hasenpusch-Theil et al., 2017). The binding reactions were separated on native 5% acrylamide gels and transferred onto positively charged nylon membranes (Roche) with a Perfect Blue Semi-dry electro blotter (60 minutes at 120volts, 5mA). After UV crosslinking, biotin labelled probes were detected using a Chemiluminiscent Nucleic Acid Detection Module (Thermo Scientific) according to manufacturer's



instructions and imaged using a Kodak BioMaxXAR film. For oligonucleotide sequences covering the wild-type or mutated Gli3 binding sites see Supplementary Tab. 1. The exchanged nucleotides in the mutated forms are underlined. Wild-type and Gli3 binding site mutant oligonucleotides were used as specific and unspecific competitors, respectively, in a 10- to 100-fold molar excess.

### Luciferase assay

Genomic DNA fragments from the *Cdk6* promoter were generated via PCR (oligonucleotide sequences available in Supplementary Table 1) with the oligonucleotides listed in Supplementary Table 1 from BAC clone RP23-53P17, subcloned using pCR-Blunt II-TOPO cloning kit (Invitrogen) and verified by sequencing. A 3.35kb *Cdk6* promoter fragment was subcloned into the pGL4.10 promoterless firefly luciferase reporter vector (Promega) after *Asp718* and *XhoI* restriction digests. HEK293 cells were transfected using Lipofectamine 2000 (Invitrogen). Gli3 repressor and GFP were expressed from previously described pCAGGS expression vectors (Persson et al., 2002). The Renilla luciferase vector was pRLSV40 (Promega). HEK293 cells were harvested 48 hr after transfections and analyzed with the Dual Luciferase Reporter Assay System (Promega).

### RNAseq, qRT-PCR, ChIPseq and Bioinformatic Analyses

For RNAseq experiments, rostromedial dorsal telencephalic tissue was dissected from E11.5 and E12.5 embryos and pooled (E11.5: six tissues; E12.5: three tissues) to generate four different replicates per genotype (control: *Emx1Cre;Gli3<sup>flox/+</sup>*; mutant: *Emx1Cre;Gli3<sup>flox/flox</sup>*). Total RNA was extracted using RNeasy Plus Mini Kit (Qiagen). After assessing the integrity of the RNA samples with an Agilent 2100 Bioanalyzer, (RIN > 8), all RNAs were further processed for RNA library preparation and sequenced (paired-end, 50 bp/100bp reads) on an Illumina SOLEXA GAII platform at Edinburgh Genomics (University of Edinburgh). Sequence reads were aligned with NCBI build 38 for *Mus musculus* and analysed using Genomatix Software Suite (Genomatix GmbH, Munich) based on the EIDorado 12-2013 database and Genomatix Genome Analyzer (GGA). The number of differentially expressed genes was determined using Ensemble as the source of transcripts and DeSeq 1.10.1 as the differential expression method with a threshold p-value  $\leq 0.05$ .

Differentially expressed genes were analysed for gene ontology using Genomatix Pathway Systems (GePS) and GeneRanker (Berriz et al., 2003). GePS allowed to create networks based on literature, where GeneRanker includes in more depth filtering with Gene Ontology or Genomatix proprietary annotation. To identify putative Gli3 binding sites in the 3.35kb upstream promoter region of *Cdk6*, the sequence was run through MatInspector of the Genomatix Software using the Gli3 weight matrices V\$GLI3.01 AND V\$GLI3.02. Identified binding sites were ranked by matrix similarity scores and the highest ranked sequences were chosen for further analysis. To validate differential expression of *Cdk6*, total RNA was isolated from the rostromedial telencephalon of E11.5 and E12.5

control and *Gli3*<sup>CKO</sup> embryos using an RNeasy Plus Micro Kit (Qiagen) and reverse transcribed using ImProm-II Reverse Transcriptase (Promega). Quantitative reverse transcription PCR (qRT-PCR) was performed using QuantiTect SYBR Green (Qiagen) and a DNA Engine Opticon System (GRI); the used oligonucleotides are summarized in Supplementary Table 1. For each sample Ct values were extrapolated using the Opticon software and ratios of relative gene expression levels of  $\beta$ -*Actin* (reference gene) and *Cdk6* were calculated based on a modified  $\Delta\Delta$ Ct method taking into account different PCR kinetics (Pfaffl, 2001); PCR efficiencies are summarized in Supplementary Table 3.

Chromatin immunoprecipitation followed by sequencing (ChIP-seq) was performed on E12.5 cerebral cortices derived from Flag-Gli3 mice (Nishi et al., 2015) using a Millipore Magna ChIP™ A/G kit and anti-Flag M2 antibody (Sigma) on 1x10<sup>6</sup> cells. Two independent ChIP experiments were sequenced on an Illumina HiSeq 2000 platform. Illumina sequencing adapters were trimmed off with Trimmomatic v0.36 software and ChIP-seq reads were aligned to the genome using Bowtie2. MACS2 (Model-based Analysis of ChIP-seq) programme was used for peak calling with mfold values 150-200 and q-value cutoff at 0.001. For graphical illustration, Gli3 ChIP samples were normalized to input samples using bamCompare.

## Statistical Analyses

Data was analysed using GraphPadPrism 6 software with n=3-7 embryos for all analyses. Power analysis of pilot experiments informed minimum samples size. Mann Whitney tests were in general performed for immunohistochemical analyses and for measurements of cortical surface area. The distribution of Tbr1+, Ctip2+ and Satb2+ neurons was analysed using a two way ANOVA followed by Sidak's multiple comparisons test. For the Palbociclib rescue experiment, ANOVA with Tukey's multiple comparisons test was performed. A single asterisk indicates significance of p<0.05, two asterisks indicate significance of p<0.01 and three asterisks of p<0.001. For quantifications of the Palbociclib rescue experiment, the observer was blinded to the experimental treatments. Due to morphological changes blinding was not possible for experiments involving *Gli3*<sup>CKO</sup> embryos older than E11.5. In these cases, scores were validated by a second independent observer.

## ACKNOWLEDGEMENTS

We are grateful to Drs Thomas Becker and Sylvie Schneider-Maunoury for critical comments on the manuscript and Alex Joyner and Sandra Blaess for the *Gli3<sup>fl/fl</sup>* mouse line, Takuji Iwasato for the *Emx1Cre* line and Wieland Huttner for the Tis21-GFP line. We also thank Emily Carroll for technical assistance.

## COMPETING INTERESTS

No competing interests declared.

## FUNDING

This work was supported by a grant from the Medical Research Council to TT (MR/K013750/1).

## DATA AVAILABILITY

Raw data from gene expression profiling were submitted to ENA, study accession numbers ERP007056 (E11.5 RNA-seq), ERP005787 (E12.5 RNA-seq) and PRJEB27543 (ChIP-seq). All other data supporting the findings of this study are available from the corresponding author on reasonable request.

## REFERENCES

- Amaniti, E. M., Fu, C., Lewis, S., Saisana, M., Magnani, D., Mason, J. O. and Theil, T.** (2015). Expansion of the piriform cortex contributes to corticothalamic pathfinding defects in Gli3 conditional mutants. *Cereb Cortex* **25**, 460-471.
- Amaniti, E. M., Hasenpusch-Theil, K., Li, Z., Magnani, D., Kessar, N., Mason, J. O. and Theil, T.** (2013). Gli3 is required in Emx1+ progenitors for the development of the corpus callosum. *Dev Biol* **376**, 113-124.
- Arai, Y., Pulvers, J. N., Haffner, C., Schilling, B., Nusslein, I., Calegari, F. and Huttner, W. B.** (2011). Neural stem and progenitor cells shorten S-phase on commitment to neuron production. *Nat Commun* **2**, 154.
- Benadiba, C., Magnani, D., Niquille, M., Morle, L., Valloton, D., Nawabi, H., Ait-Lounis, A., Otsmane, B., Reith, W., Theil, T., et al.** (2012). The ciliogenic transcription factor RFX3 regulates early midline distribution of guidepost neurons required for corpus callosum development. *PLoS genetics* **8**, e1002606.
- Berriz, G. F., King, O. D., Bryant, B., Sander, C. and Roth, F. P.** (2003). Characterizing gene sets with FuncAssociate. *Bioinformatics* **19**, 2502-2504.
- Blaess, S., Stephen, D. and Joyner, A. L.** (2008). Gli3 coordinates three-dimensional patterning and growth of the tectum and cerebellum by integrating Shh and Fgf8 signaling. *Development* **135**, 2093-2103.
- Blomen, V. A. and Boonstra, J.** (2007). Cell fate determination during G1 phase progression. *Cellular and molecular life sciences : CMLS* **64**, 3084-3104.
- Bonatz, E., Descartes, M. and Tamarapalli, J. R.** (1997). Acrocallosal syndrome: a case report. *J Hand Surg [Am]* **22**, 492-494.
- Calegari, F., Haubensak, W., Haffner, C. and Huttner, W. B.** (2005). Selective lengthening of the cell cycle in the neurogenic subpopulation of neural progenitor cells during mouse brain development. *J Neurosci* **25**, 6533-6538.
- Calegari, F. and Huttner, W. B.** (2003). An inhibition of cyclin-dependent kinases that lengthens, but does not arrest, neuroepithelial cell cycle induces premature neurogenesis. *J Cell Sci* **116**, 4947-4955.
- Caviness, V. S., Jr., Takahashi, T. and Nowakowski, R. S.** (1995). Numbers, time and neocortical neuronogenesis: a general developmental and evolutionary model. *Trends in neurosciences* **18**, 379-383.
- Choi, Y. J. and Anders, L.** (2014). Signaling through cyclin D-dependent kinases. *Oncogene* **33**, 1890-1903.
- Elson, E., Perveen, R., Donnai, D., Wall, S. and Black, G. C.** (2002). De novo GLI3 mutation in acrocallosal syndrome: broadening the phenotypic spectrum of GLI3 defects and overlap with murine models. *Journal of medical genetics* **39**, 804-806.
- Ely, S., Di Liberto, M., Niesvizky, R., Baughn, L. B., Cho, H. J., Hatada, E. N., Knowles, D. M., Lane, J. and Chen-Kiang, S.** (2005). Mutually exclusive cyclin-dependent kinase 4/cyclin D1 and cyclin-dependent kinase 6/cyclin D2 pairing inactivates retinoblastoma protein and promotes cell cycle dysregulation in multiple myeloma. *Cancer Res* **65**, 11345-11353.
- Englund, C., Fink, A., Lau, C., Pham, D., Daza, R. A., Bulfone, A., Kowalczyk, T. and Hevner, R. F.** (2005). Pax6, Tbr2, and Tbr1 are expressed sequentially by radial glia, intermediate progenitor cells, and postmitotic neurons in developing neocortex. *J Neurosci* **25**, 247-251.
- Florio, M. and Huttner, W. B.** (2014). Neural progenitors, neurogenesis and the evolution of the neocortex. *Development* **141**, 2182-2194.
- Fry, D. W., Harvey, P. J., Keller, P. R., Elliott, W. L., Meade, M., Trachet, E., Albassam, M., Zheng, X., Leopold, W. R., Pryer, N. K., et al.** (2004). Specific inhibition of cyclin-dependent kinase 4/6 by PD 0332991 and associated antitumor activity in human tumor xenografts. *Mol Cancer Ther* **3**, 1427-1438.
- Gorski, J. A., Talley, T., Qiu, M., Puelles, L., Rubenstein, J. L. and Jones, K. R.** (2002). Cortical excitatory neurons and glia, but not GABAergic neurons, are produced in the Emx1-expressing lineage. *J Neurosci* **22**, 6309-6314.
- Götz, M. and Huttner, W. B.** (2005). The cell biology of neurogenesis. *Nat Rev Mol Cell Biol* **6**, 777-788.

- Götz, M., Stoykova, A. and Gruss, P.** (1998). Pax6 controls radial glia differentiation in the cerebral cortex. *Neuron* **21**, 1031-1044.
- Hall, P. A., Levison, D. A., Woods, A. L., Yu, C. C., Kellock, D. B., Watkins, J. A., Barnes, D. M., Gillett, C. E., Camplejohn, R., Dover, R., et al.** (1990). Proliferating cell nuclear antigen (PCNA) immunolocalization in paraffin sections: an index of cell proliferation with evidence of deregulated expression in some neoplasms. *The Journal of pathology* **162**, 285-294.
- Hasenpusch-Theil, K., Watson, J. A. and Theil, T.** (2017). Direct Interactions Between Gli3, Wnt8b, and Fgfs Underlie Patterning of the Dorsal Telencephalon. *Cereb Cortex* **27**, 1137-1148.
- Haubensak, W., Attardo, A., Denk, W. and Huttner, W. B.** (2004). Neurons arise in the basal neuroepithelium of the early mammalian telencephalon: a major site of neurogenesis. *Proc Natl Acad Sci U S A* **101**, 3196-3201.
- Haushalter, C., Asselin, L., Fraulob, V., Dolle, P. and Rhinn, M.** (2017). Retinoic acid controls early neurogenesis in the developing mouse cerebral cortex. *Dev Biol* **430**, 129-141.
- Hepker, J., Blackman, R. K. and Holmgren, R.** (1999). Cubitus interruptus is necessary but not sufficient for direct activation of a wing-specific decapentaplegic enhancer. *Development* **126**, 3669-3677.
- Iacopetti, P., Michelini, M., Stuckmann, I., Oback, B., Aaku-Saraste, E. and Huttner, W. B.** (1999). Expression of the antiproliferative gene TIS21 at the onset of neurogenesis identifies single neuroepithelial cells that switch from proliferative to neuron-generating division. *Proc Natl Acad Sci U S A* **96**, 4639-4644.
- Kageyama, R., Ohtsuka, T. and Kobayashi, T.** (2008). Roles of Hes genes in neural development. *Development, growth & differentiation* **50 Suppl 1**, S97-103.
- Kitagawa, M., Higashi, H., Jung, H. K., Suzuki-Takahashi, I., Ikeda, M., Tamai, K., Kato, J., Segawa, K., Yoshida, E., Nishimura, S., et al.** (1996). The consensus motif for phosphorylation by cyclin D1-Cdk4 is different from that for phosphorylation by cyclin A/E-Cdk2. *The EMBO journal* **15**, 7060-7069.
- Laclef, C., Anselme, I., Besse, L., Catala, M., Palmyre, A., Baas, D., Paschaki, M., Pedraza, M., Metin, C., Durand, B., et al.** (2015). The role of primary cilia in corpus callosum formation is mediated by production of the Gli3 repressor. *Human molecular genetics* **24**, 4997-5014.
- Lange, C., Huttner, W. B. and Calegari, F.** (2009). Cdk4/cyclinD1 overexpression in neural stem cells shortens G1, delays neurogenesis, and promotes the generation and expansion of basal progenitors. *Cell Stem Cell* **5**, 320-331.
- Lim, S. and Kaldis, P.** (2013). Cdks, cyclins and CKIs: roles beyond cell cycle regulation. *Development* **140**, 3079-3093.
- Lopez-Rios, J., Speziale, D., Robay, D., Scotti, M., Osterwalder, M., Nusspaumer, G., Galli, A., Hollander, G. A., Kmita, M. and Zeller, R.** (2012). GLI3 constrains digit number by controlling both progenitor proliferation and BMP-dependent exit to chondrogenesis. *Dev Cell* **22**, 837-848.
- Magnani, D., Hasenpusch-Theil, K., Jacobs, E. C., Campagnoni, A. T., Price, D. J. and Theil, T.** (2010). The Gli3 hypomorphic mutation Pdn causes selective impairment in the growth, patterning, and axon guidance capability of the lateral ganglionic eminence. *J Neurosci* **30**, 13883-13894.
- Magnani, D., Hasenpusch-Theil, K. and Theil, T.** (2013). Gli3 controls subplate formation and growth of cortical axons. *Cerebral cortex* **23**, 2542-2551.
- Martynoga, B., Morrison, H., Price, D. J. and Mason, J. O.** (2005). Foxg1 is required for specification of ventral telencephalon and region-specific regulation of dorsal telencephalic precursor proliferation and apoptosis. *Dev Biol* **283**, 113-127.
- Maynard, T. M., Jain, M. D., Balmer, C. W. and LaMantia, A. S.** (2002). High-resolution mapping of the Gli3 mutation extra-toes reveals a 51.5-kb deletion. *Mamm Genome* **13**, 58-61.
- Mi, D., Carr, C. B., Georgala, P. A., Huang, Y. T., Manuel, M. N., Jeanes, E., Niisato, E., Sansom, S. N., Livesey, F. J., Theil, T., et al.** (2013). Pax6 exerts regional control of cortical progenitor proliferation via direct repression of Cdk6 and hypophosphorylation of pRb. *Neuron* **78**, 269-284.
- Miyama, S., Takahashi, T., Nowakowski, R. S. and Caviness, V. S., Jr.** (1997). A gradient in the duration of the G1 phase in the murine neocortical proliferative epithelium. *Cereb Cortex* **7**, 678-689.



- Miyata, T., Kawaguchi, A., Saito, K., Kawano, M., Muto, T. and Ogawa, M.** (2004). Asymmetric production of surface-dividing and non-surface-dividing cortical progenitor cells. *Development* **131**, 3133-3145.
- Nishi, Y., Zhang, X., Jeong, J., Peterson, K. A., Vedenko, A., Bulyk, M. L., Hide, W. A. and McMahon, A. P.** (2015). A direct fate exclusion mechanism by Sonic hedgehog-regulated transcriptional repressors. *Development* **142**, 3286-3293.
- Noctor, S. C., Martinez-Cerdeno, V., Ivic, L. and Kriegstein, A. R.** (2004). Cortical neurons arise in symmetric and asymmetric division zones and migrate through specific phases. *Nat Neurosci* **7**, 136-144.
- Nowakowski, R. S., Lewin, S. B. and Miller, M. W.** (1989). Bromodeoxyuridine immunohistochemical determination of the lengths of the cell cycle and the DNA-synthetic phase for an anatomically defined population. *J Neurocytol* **18**, 311-318.
- Palma, V. and Ruiz i Altaba, A.** (2004). Hedgehog-Gli signaling regulates the behavior of cells with stem cell properties in the developing neocortex. *Development* **131**, 337-345.
- Persson, M., Stamatakis, D., te Welscher, P., Andersson, E., Bose, J., Ruther, U., Ericson, J. and Briscoe, J.** (2002). Dorsal-ventral patterning of the spinal cord requires Gli3 transcriptional repressor activity. *Genes Dev* **16**, 2865-2878.
- Pfaffl, M. W.** (2001). A new mathematical model for relative quantification in real-time RT-PCR. *Nucleic acids research* **29**, e45.
- Philip, N., Apicella, N., Lassman, I., Ayme, S., Mattei, J. F. and Giraud, F.** (1988). The acrocallosal syndrome. *Eur J Pediatr* **147**, 206-208.
- Pierfelice, T., Alberi, L. and Gaiano, N.** (2011). Notch in the vertebrate nervous system: an old dog with new tricks. *Neuron* **69**, 840-855.
- Pilaz, L. J., Patti, D., Marcy, G., Ollier, E., Pfister, S., Douglas, R. J., Betizeau, M., Gautier, E., Cortay, V., Doerflinger, N., et al.** (2009). Forced G1-phase reduction alters mode of division, neuron number, and laminar phenotype in the cerebral cortex. *Proc Natl Acad Sci U S A* **106**, 21924-21929.
- Pollen, A. A., Nowakowski, T. J., Chen, J., Retallack, H., Sandoval-Espinosa, C., Nicholas, C. R., Shuga, J., Liu, S. J., Oldham, M. C., Diaz, A., et al.** (2015). Molecular identity of human outer radial glia during cortical development. *Cell* **163**, 55-67.
- Pollen, A. A., Nowakowski, T. J., Shuga, J., Wang, X., Leyrat, A. A., Lui, J. H., Li, N., Szpankowski, L., Fowler, B., Chen, P., et al.** (2014). Low-coverage single-cell mRNA sequencing reveals cellular heterogeneity and activated signaling pathways in developing cerebral cortex. *Nat Biotechnol* **32**, 1053-1058.
- Rash, B. G. and Grove, E. A.** (2007). Patterning the dorsal telencephalon: a role for sonic hedgehog? *J Neurosci* **27**, 11595-11603.
- Ren, B., Cam, H., Takahashi, Y., Volkert, T., Terragni, J., Young, R. A. and Dynlacht, B. D.** (2002). E2F integrates cell cycle progression with DNA repair, replication, and G(2)/M checkpoints. *Genes Dev* **16**, 245-256.
- Sahara, S. and O'Leary, D. D.** (2009). Fgf10 regulates transition period of cortical stem cell differentiation to radial glia controlling generation of neurons and basal progenitors. *Neuron* **63**, 48-62.
- Schinzel, A.** (1979). Postaxial polydactyly, hallux duplication, absence of the corpus callosum, macrocephaly and severe mental retardation: a new syndrome? *Helv Paediatr Acta* **34**, 141-146.
- Siegenthaler, J. A., Ashique, A. M., Zerbatis, K., Patterson, K. P., Hecht, J. H., Kane, M. A., Folias, A. E., Choe, Y., May, S. R., Kume, T., et al.** (2009). Retinoic acid from the meninges regulates cortical neuron generation. *Cell* **139**, 597-609.
- Soufi, A. and Dalton, S.** (2016). Cycling through developmental decisions: how cell cycle dynamics control pluripotency, differentiation and reprogramming. *Development* **143**, 4301-4311.
- Takahashi, T., Nowakowski, R. S. and Caviness, V. S., Jr.** (1995). The cell cycle of the pseudostratified ventricular epithelium of the embryonic murine cerebral wall. *J Neurosci* **15**, 6046-6057.
- Theil, T.** (2005). Gli3 is required for the specification and differentiation of preplate neurons. *Dev Biol* **286**, 559-571.
- Theil, T., Alvarez-Bolado, G., Walter, A. and Ruther, U.** (1999). Gli3 is required for Emx gene expression during dorsal telencephalon development. *Development* **126**, 3561-3571.

- Tole, S., Ragsdale, C. W. and Grove, E. A.** (2000). Dorsoventral patterning of the telencephalon is disrupted in the mouse mutant extra-toes(J). *Dev Biol* **217**, 254-265.
- Turrero Garcia, M., Chang, Y., Arai, Y. and Huttner, W. B.** (2016). S-phase duration is the main target of cell cycle regulation in neural progenitors of developing ferret neocortex. *J Comp Neurol* **524**, 456-470.
- Ueta, E., Nanba, E. and Naruse, I.** (2002). Integration of a transposon into the Gli3 gene in the Pdn mouse. *Congenit Anom (Kyoto)* **42**, 318-322.
- Vokes, S. A., Ji, H., Wong, W. H. and McMahon, A. P.** (2008). A genome-scale analysis of the cis-regulatory circuitry underlying sonic hedgehog-mediated patterning of the mammalian limb. *Genes & development* **22**, 2651-2663.
- Wang, H., Ge, G., Uchida, Y., Luu, B. and Ahn, S.** (2011). Gli3 is required for maintenance and fate specification of cortical progenitors. *J Neurosci* **31**, 6440-6448.
- Wang, H., Kane, A. W., Lee, C. and Ahn, S.** (2014). Gli3 repressor controls cell fates and cell adhesion for proper establishment of neurogenic niche. *Cell reports* **8**, 1093-1104.
- Warren, N., Caric, D., Pratt, T., Clausen, J. A., Asavaritikrai, P., Mason, J. O., Hill, R. E. and Price, D. J.** (1999). The transcription factor, Pax6, is required for cell proliferation and differentiation in the developing cerebral cortex. *Cereb Cortex* **9**, 627-635.
- Yam, C. H., Fung, T. K. and Poon, R. Y.** (2002). Cyclin A in cell cycle control and cancer. *Cellular and molecular life sciences : CMLS* **59**, 1317-1326.
- Zarkowska, T. and Mitnacht, S.** (1997). Differential phosphorylation of the retinoblastoma protein by G1/S cyclin-dependent kinases. *J Biol Chem* **272**, 12738-12746.



Figures

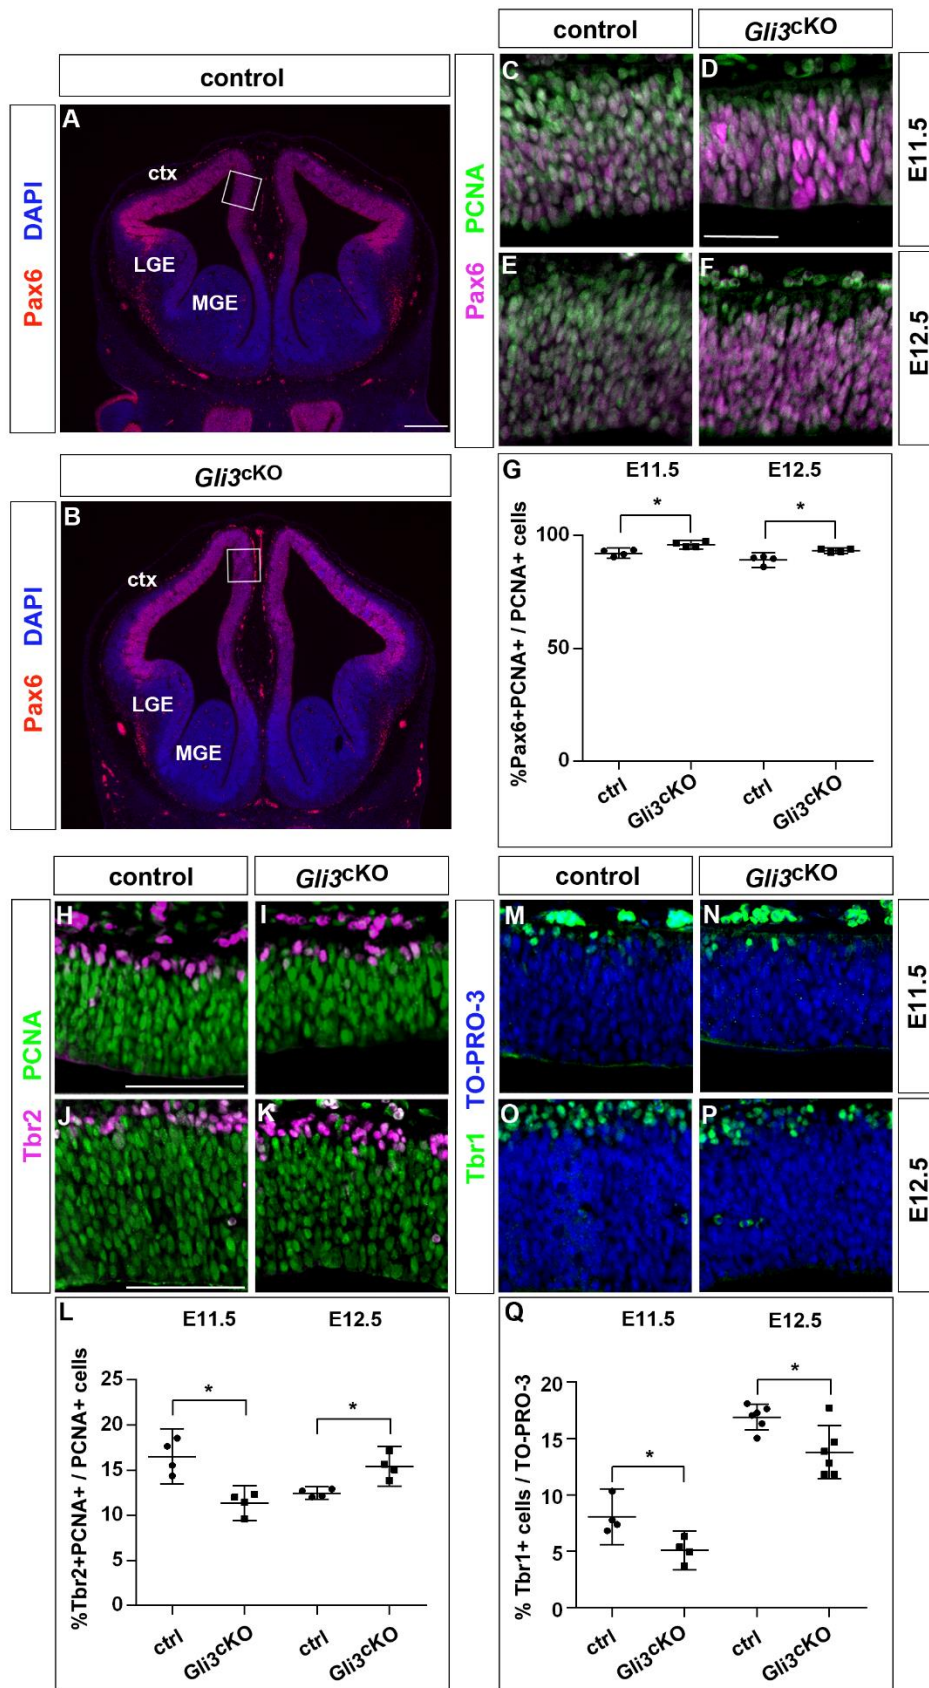

**Figure 1: Altered proportions of radial glial cells, basal progenitors and neurons in *Gli3* conditional mutants.** (A, B) Coronal sections of E12.5 forebrains stained with DAPI and Pax6 illustrating the overall morphology and the extent of the dorsal telencephalon in *Gli3*<sup>CKO</sup> mutants. Boxes indicate the region at which cell counts were performed. (C-G) Pax6/PCNA double immunofluorescence staining determines the proportion of radial glial cells. (G) The fraction of radial glial cells is increased in E11.5 and E12.5 *Gli3*<sup>CKO</sup> embryos. (H-L) Tbr2 and PCNA immunostaining on brain sections showed that the proportion of basal progenitors is decreased at E11.5 but increases at E12.5. (M-Q) Reduced proportions of neurons in the rostromedial telencephalon of *Gli3*<sup>CKO</sup> embryos as revealed by staining for Tbr1 and TO-PRO-3. All statistical data is presented as means ± 95% confidence intervals (CI); Mann Whitney tests; n = 4 except for (N, P) with n=6; \* p < 0.05. Scale bars: 250µm (A); 25 µm (D); 50 µm (H). ctx: cortex; MGE: medial ganglionic eminence; LGE: lateral ganglionic eminence.

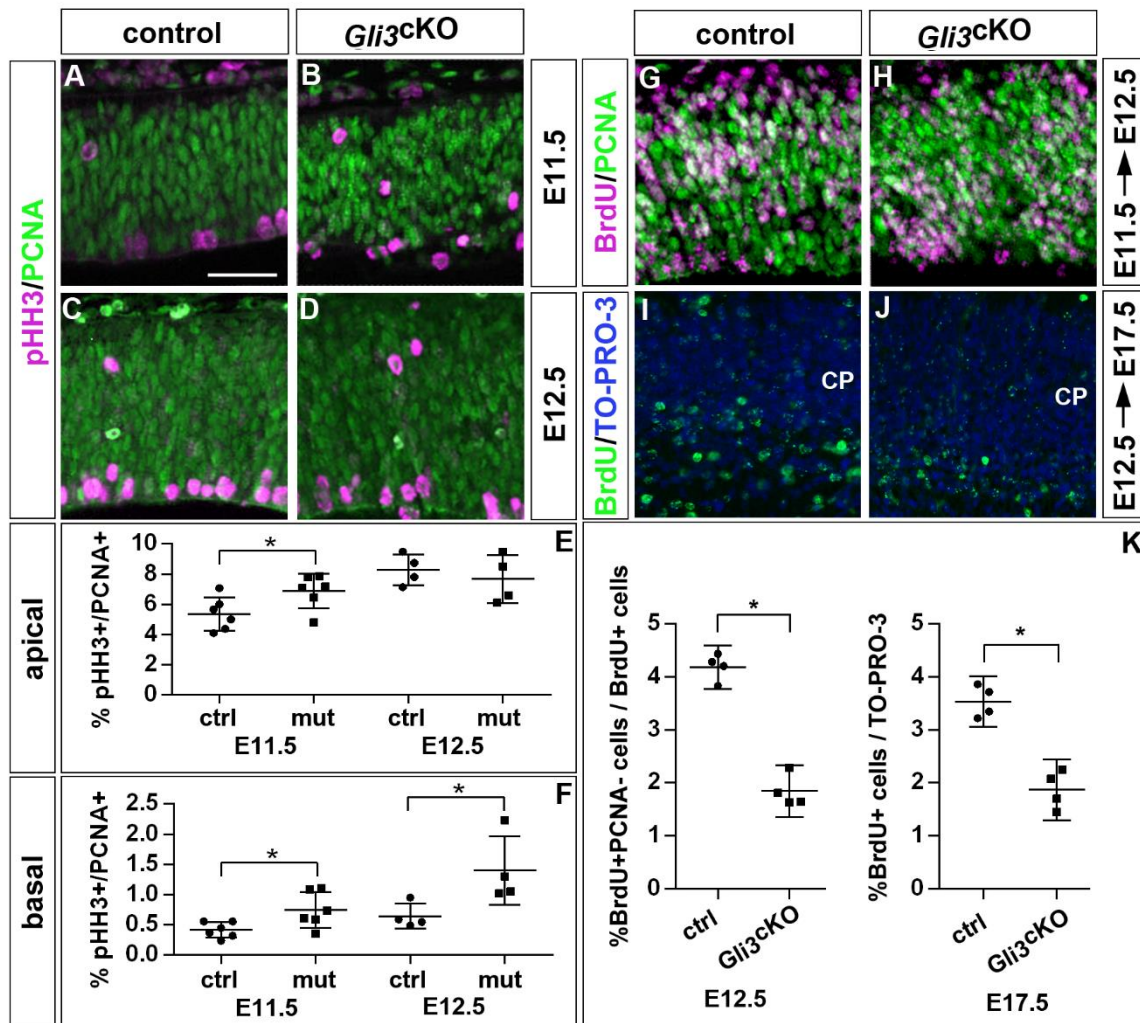

**Figure 2: Increased proliferation and reduced cell cycle exit in *Gli3<sup>ckO</sup>* mutants.** (A-D) Sections of E11.5 and E12.5 control and *Gli3<sup>ckO</sup>* embryos stained with pHH3/PCNA. (E, F) Quantifications of the data presented in (A-D) showing increased proportions of RGCs (E11.5) and basal progenitors (E11.5 and E12.5) undergoing mitosis. (G, H) BrdU/PCNA immunohistochemistry on sections of E12.5 control and *Gli3<sup>ckO</sup>* embryos which were treated with BrdU 24 hours earlier. (I, J) BrdU immunofluorescence staining on sections of E17.5 control (I) and *Gli3<sup>ckO</sup>* embryos (J) to reveal neurons born at E12.5. Only the cortical plate (CP) is shown. (K) Quantification of the data presented in (G-J) showing decreased cell cycle exit and neuron formation in *Gli3<sup>ckO</sup>* embryos. All statistical data is presented as means  $\pm$  95% CI; n = 6 (A, B) and n=4 (C, D, G-J); \* p < 0.05; Mann Whitney test. Scale bar: 25  $\mu$ m (A).



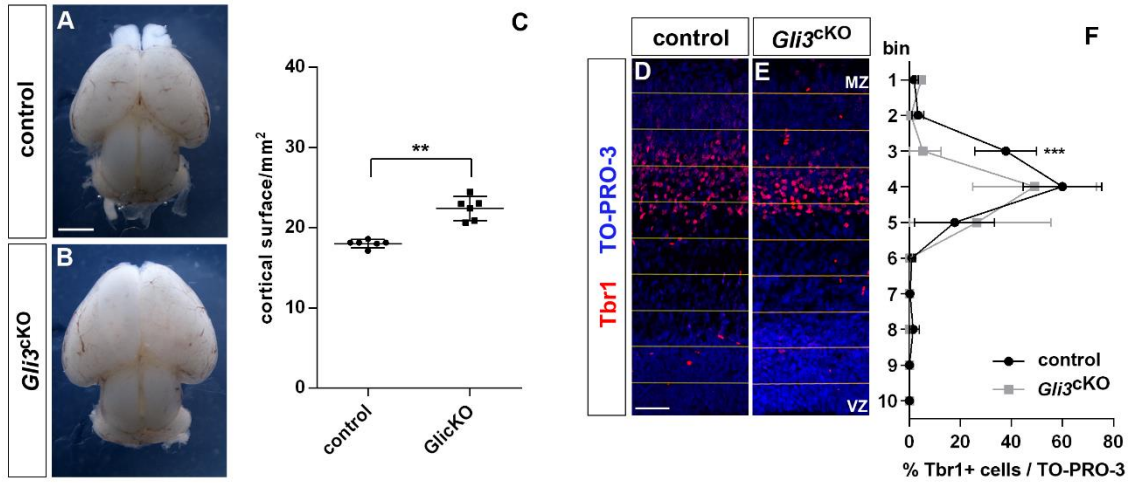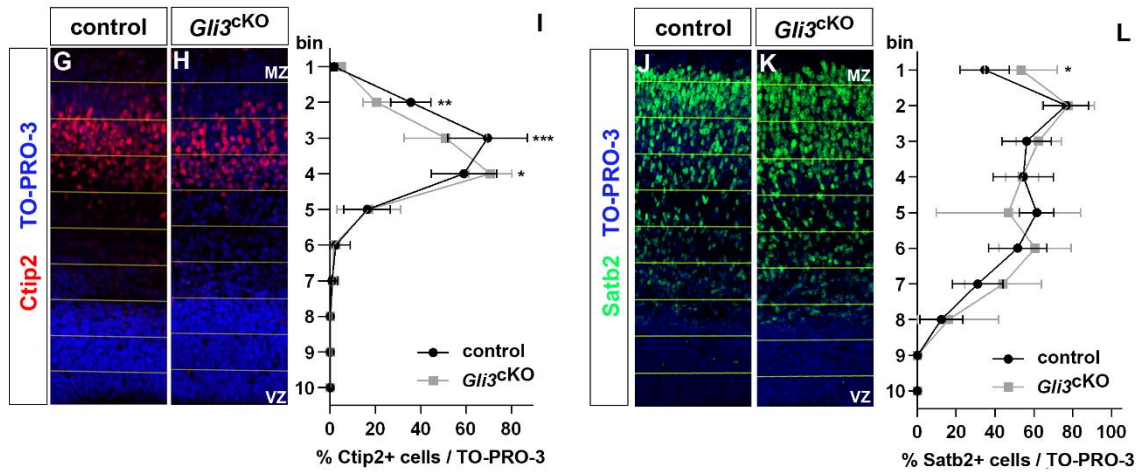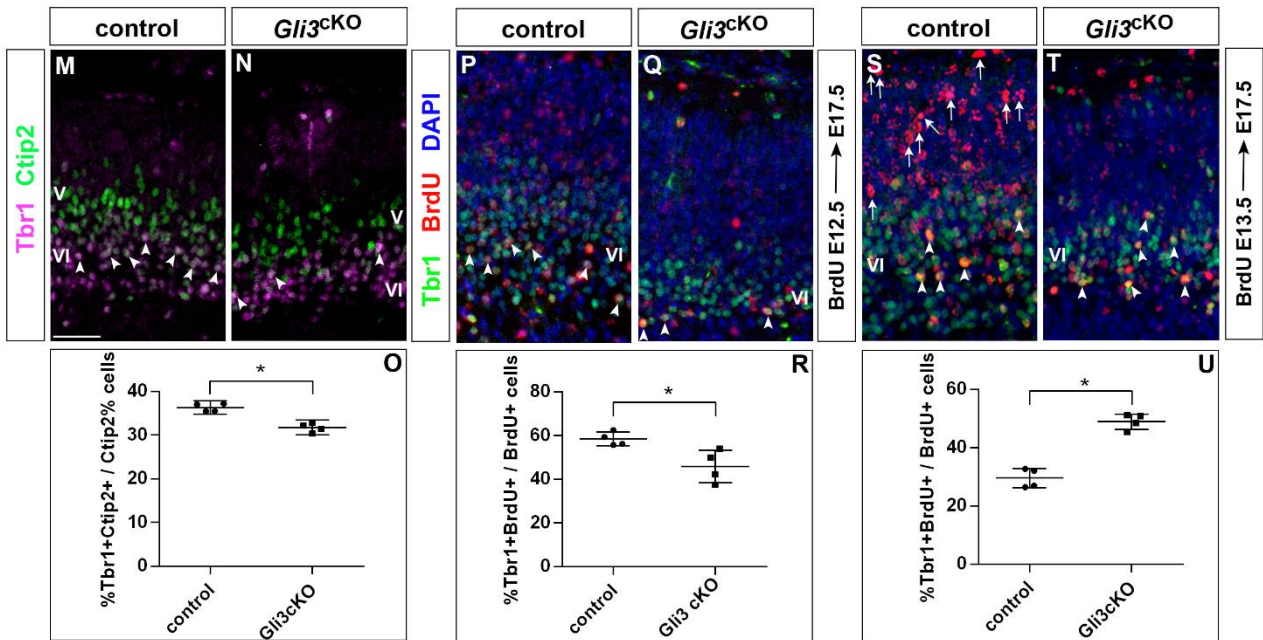

**Figure 3: *Gli3* conditional inactivation affects cortical size and architecture.** (A, B) Dorsal views of E18.5 control (A) and *Gli3*<sup>CKO</sup> (B) brains. *Gli3*<sup>CKO</sup> embryos only form a small olfactory bulb-like structure in the rostral telencephalon which is not visible in this dorsal view (Amaniti et al., 2015). (C) Graph comparing the surface area of control and *Gli3*<sup>CKO</sup> cerebral cortices. (D-L) Immunohistochemistry on E17.5 control and *Gli3*<sup>CKO</sup> brains using the indicated antibodies. (D-F) Tbr1<sup>+</sup> neurons occupy a reduced area in the deep cortical plate of the *Gli3*<sup>CKO</sup> cortex. (G-I) Ctip2<sup>+</sup> neurons occupy deeper positions in the cortical plate of *Gli3*<sup>CKO</sup> embryos. (J-L) Distribution of Satb2<sup>+</sup> upper layer neurons which have not completed their migration at this stage. (M-O) Tbr1 and Ctip2 double immunofluorescence on coronal sections of E17.5 brains showed that the relative position of Tbr1<sup>+</sup> layer VI and Ctip2<sup>+</sup> layer V neurons is maintained in *Gli3*<sup>CKO</sup> embryos. Moreover, the proportion of Tbr1<sup>+</sup>Ctip2<sup>+</sup> double positive neurons is reduced in the mutant (O). (P-U) The formation of Tbr1<sup>+</sup> neurons is delayed in *Gli3*<sup>CKO</sup> embryos. (P-R) The proportion of Tbr1<sup>+</sup> neurons born at E12.5 (arrows) is reduced in *Gli3*<sup>CKO</sup> embryos. (S-U) BrdU birthdating at E13.5 showed an increase in BrdU<sup>+</sup>Tbr1<sup>+</sup> neurons (arrowheads) in *Gli3*<sup>CKO</sup> embryos. Note the large number of BrdU<sup>+</sup>Tbr1<sup>-</sup> neurons (arrows) superficial to the Tbr1 domain in control embryos. All statistical data is presented as means ± 95% CI; n = 6 (A-C) and n = 4 (D-U); \* p < 0.05; \*\* p < 0.01; \*\*\* p < 0.005; Mann Whitney test (C) and two way ANOVA followed by Sidak's multiple comparisons test (F, I, L). Mann Whitney tests (O, R, U). MZ, marginal zone; VZ, ventricular zone. Scale bars: 2mm (A); 50 μm (D, M).

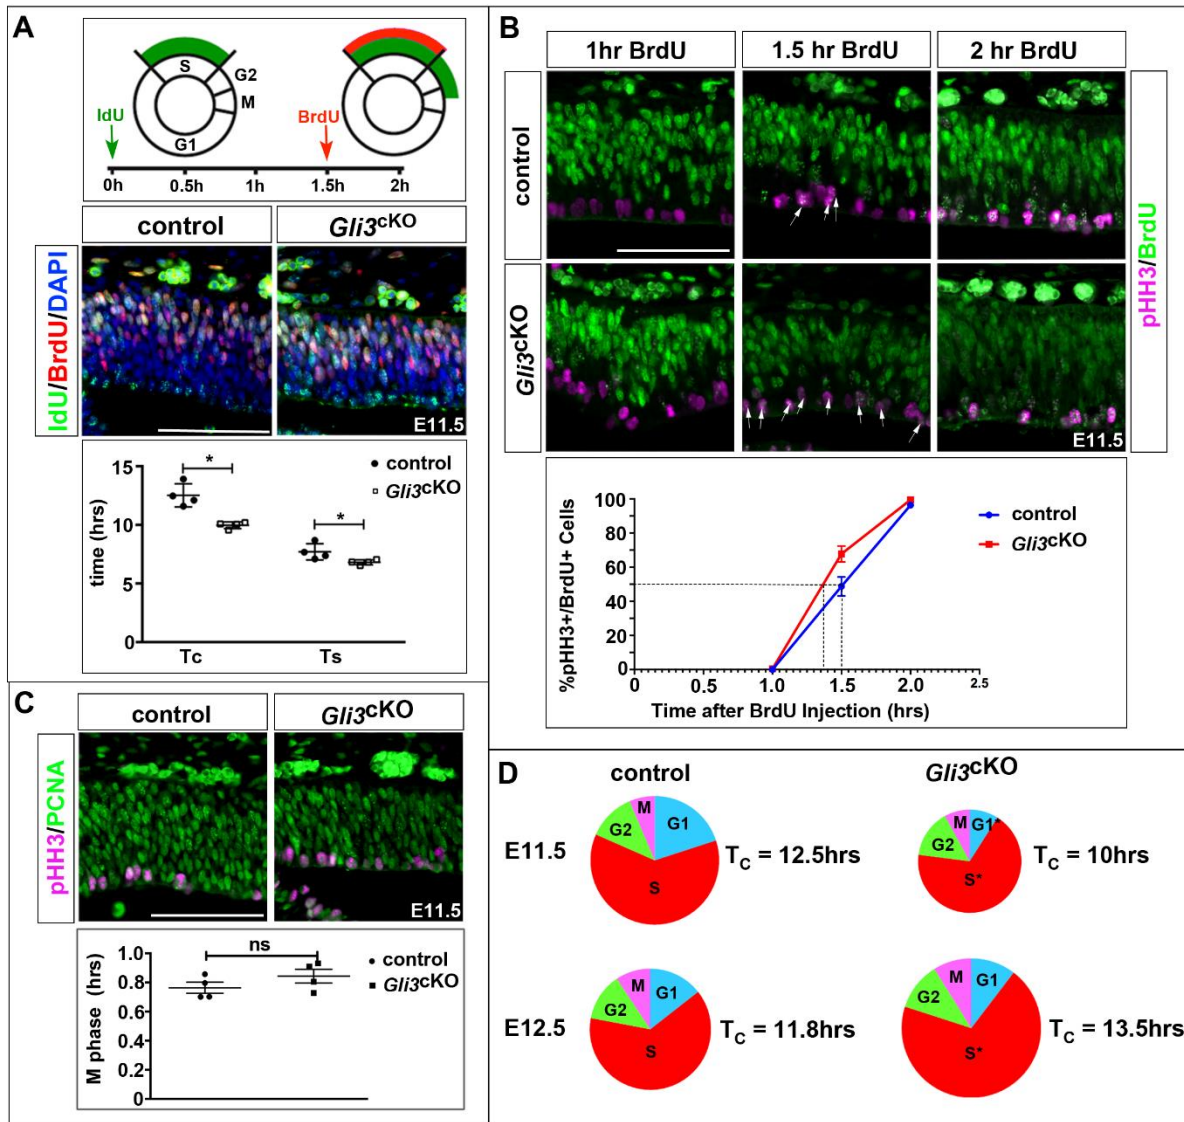

**Figure 4: Cell cycle length of cortical progenitors is affected in *Gli3*<sup>CKO</sup> embryos.** (A) BrdU/IdU double labelling experiments to determine total cell cycle length  $T_C$  and S phase duration  $T_S$  which were calculated from counts of IdU+BrdU- and IdU+BrdU+ cells as described (Martynoga et al., 2005). E11.5 *Gli3*<sup>CKO</sup> embryos show a shortening of  $T_C$  and  $T_S$ . (B) BrdU labelling experiments to investigate the duration of G2 ( $T_{G2}$ ). Double labelling for BrdU and pHH3 determined the proportion of BrdU+/pHH3+ cells (arrows).  $T_{G2}$  corresponds to the time when 50% of pHH3+ cells are BrdU+ and is not significantly altered between E11.5 control and *Gli3*<sup>CKO</sup> embryos. (C) Determining M Phase ( $T_M$ ) length using immunostainings for pHH3 and PCNA which label mitotic and proliferating cells, respectively. The fraction of mitotic cells multiplied by total cell cycle length provides  $T_M$  duration, which is not significantly altered in E11.5 *Gli3*<sup>CKO</sup> embryos. (D) Pie charts summarizing the length of total and individual cell cycle phases in E11.5 and E12.5 control and *Gli3*<sup>CKO</sup> embryos. Shorter G1 and S phases contribute to a shortening of the overall cell cycle at E11.5 while  $T_C$  is increased at E12.5 due to longer S and M phases. Scale bars: 50 $\mu$ m.

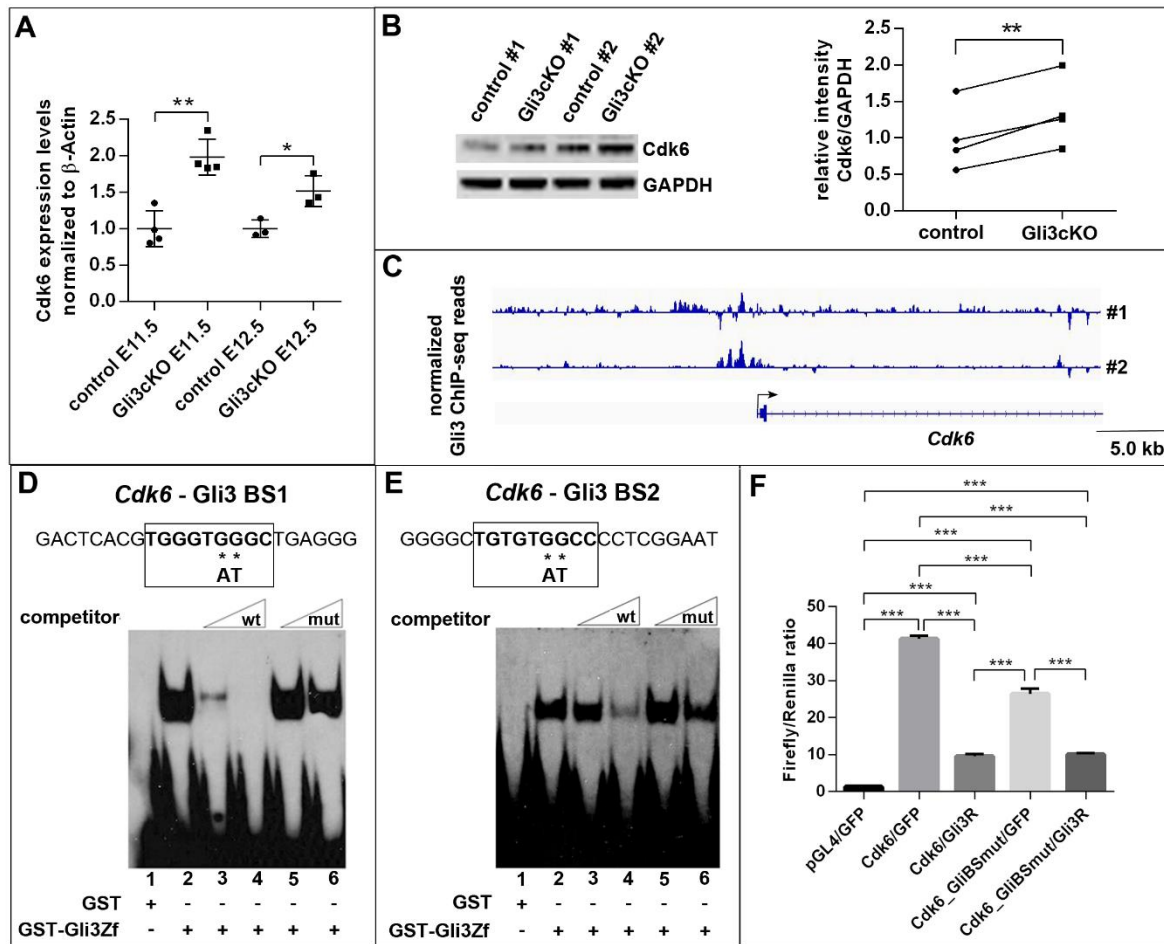

**Figure 5: Gli3 represses *Cdk6* expression.** (A) Representative example of qRT-PCR analyses showing increased *Gli3* mRNA expression in the rostromedial telencephalon of E11.5 and E12.5 *Gli3*<sup>CKO</sup> embryos. (B) Western blot analysis showing an up-regulation of *Cdk6* expression in the dorsal telencephalon of E12.5 of *Gli3*<sup>CKO</sup> embryos. Data expressed as *Cdk6* expression relative to GAPDH which served as a loading control. A paired t-test was used to evaluate relative *Cdk6* expression levels in four control/*Gli3*<sup>CKO</sup> embryo pairs derived from four different litters. (C) Gli3 chromatin immunoprecipitation followed by sequencing revealed several peaks that are associated with the *Cdk6* promoter region. Gli3 ChIP-seq reads were normalized to input. (D, E) Electromobility shift assays showing in vitro binding of recombinant Gli3 protein to binding sites 1 (D) and 2 (E) in the *Cdk6* promoter (lane 2). Complex formation is competed by increasing amounts of wild-type oligonucleotide (lanes 3 and 4) but not by oligonucleotides containing the indicated point mutations in the Gli3 binding sites (lanes 5 and 6). (F) Gli3 represses *Cdk6* promoter activity in luciferase assays. Firefly luciferase activity was measured relative to Renilla luciferase control in HEK293 cells transfected with the indicated constructs. pGL4 is the promoterless vector used to make the *Cdk6* promoter construct (*Cdk6*) which was either co-transfected with a GFP expression vector (GFP) or with a Gli3 repressor (Gli3R) construct. Data is representative of one of three independent experiments each using 3 technical replicates. Means  $\pm$  95%CI (n = 3); \* p < 0.05; \*\* p < 0.01; \*\*\* p < 0.001.



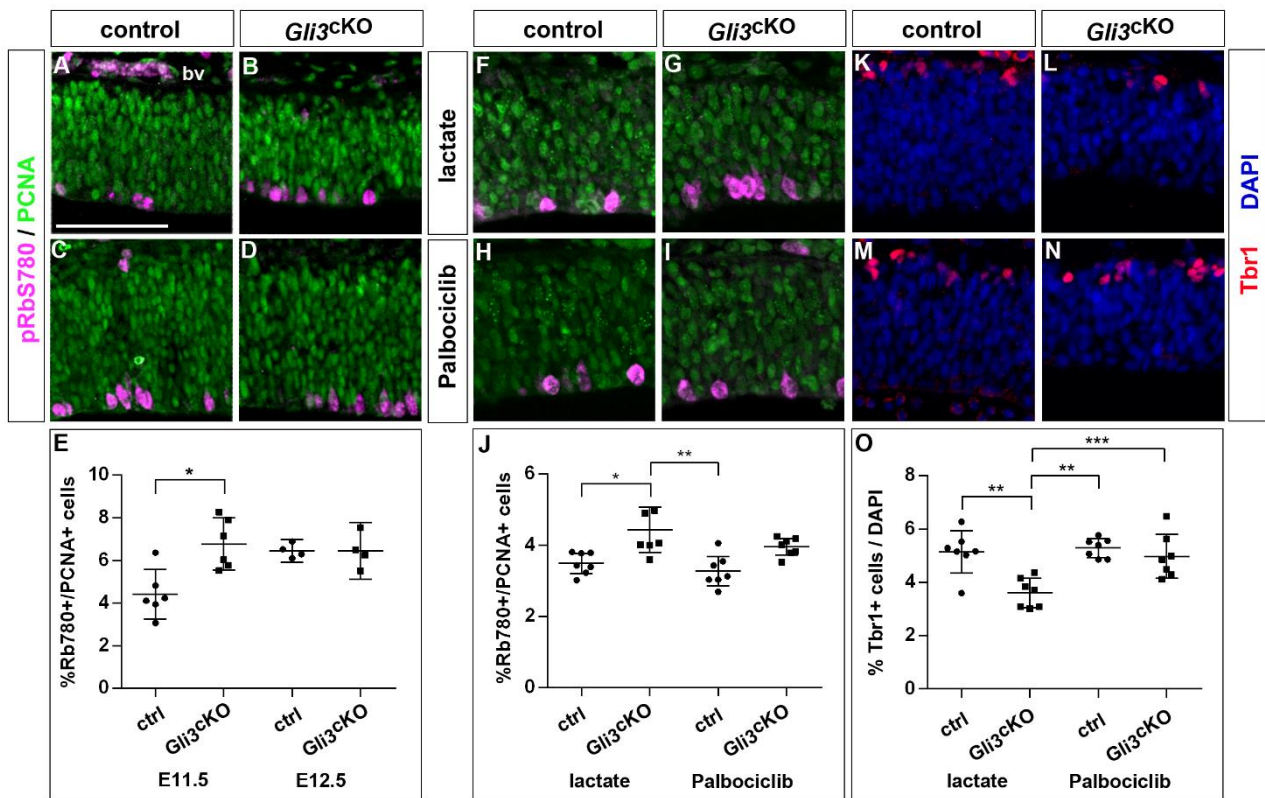

**Figure 6: Interfering with Cdk6 kinase activity rescues the early delay in neurogenesis in *Gli3<sup>CKO</sup>* embryos.** (A-D) Immunohistochemistry showing expression of pRbS780 and PCNA in E11.5 (A, B) and E12.5 (C, D) control and *Gli3<sup>CKO</sup>* embryos. (E) Quantification of the proportions of pRbS780+/PCNA+ cells which is increased in *Gli3<sup>CKO</sup>* embryos. (F-I) Immunostaining for pRbS780 and PCNA in E11.5 control and *Gli3<sup>CKO</sup>* embryos 24 hours after treatment with lactate as vehicle or with the Cdk6 inhibitor Palbociclib. (J) Quantification of the pRbS780+/PCNA+ cell proportion after treatment with lactate or Palbociclib. (K-N) Immunohistochemistry for Tbr1 revealing the proportions of neurons in E11.5 control and *Gli3<sup>CKO</sup>* embryos after lactate or Palbociclib administration. (O) Quantifications of the immunostainings in (K-N). All statistical data is presented as means  $\pm$  95% CI; n = 4 for (B, D); n = 6 for (A, C); n = 7 for (F-I and K-N); \* p < 0.05; \*\* p < 0.01; \*\*\* p < 0.005; Mann Whitney test (E); ANOVA with Tukey multiple comparison's test (J, O). Scale bar: 50 $\mu$ m. bv: blood vessels.

**Table 1: Summary of cell cycle times in *Gli3* mutant cortex**

|                            | <b>T<sub>C</sub>/hrs</b> | <b>T<sub>S</sub>/hrs</b> | <b>T<sub>G2</sub>/hrs</b> | <b>T<sub>M</sub>/hrs</b> | <b>T<sub>G1</sub>/hrs</b> |
|----------------------------|--------------------------|--------------------------|---------------------------|--------------------------|---------------------------|
| <b>E11.5</b>               |                          |                          |                           |                          |                           |
| control                    | 12.5                     | 7.7                      | 1.5                       | 0.8                      | 2.5                       |
| <i>Gli3</i> <sup>CKO</sup> | <b>10.0</b>              | <b>6.8</b>               | 1.5                       | 0.8                      | <b>0.9</b>                |
|                            |                          |                          |                           |                          |                           |
| <b>E12.5</b>               |                          |                          |                           |                          |                           |
| control                    | 11.8                     | 7.5                      | 1.5                       | 1.1                      | 1.7                       |
| <i>Gli3</i> <sup>CKO</sup> | <b>13.5</b>              | <b>9.4</b>               | 1.5                       | 1.2                      | 1.4                       |
|                            |                          |                          |                           |                          |                           |

Statistically significant changes in cell cycle times are indicated in bold, red colour represents a down-regulation, green colour an up-regulation.

**Supplementary Figure 1: Gli3 expression in cortical progenitors and in *Gli3<sup>ckO</sup>* embryos.** (A, E) Gli3 protein is co-expressed with Pax6 in radial glial cells in the rostromedial (A) and lateral telencephalon (E). (B-D, F-H) Gli3 is transiently expressed in Tbr2+ basal progenitor cells. In the lateral telencephalon, basal progenitors in the deep ventricular zone express Gli3, while Tbr2+ cells in upper positions express little or no Gli3. Arrows demarcate Gli3+Tbr2+ basal progenitors, arrowheads Gli3-Tbr2+ cells. (I-L) Gli3 protein is expressed in the dorsal telencephalon and in the lateral ganglionic eminence (LGE) of E11.5 (I, J) and E12.5 (K, L) embryos and shows a dorsal to ventral expression gradient in the thalamus (th) (L, P). (M, N) In E11.5 *Gli3<sup>ckO</sup>* embryos, Gli3 protein is still present in the rostrolateral cortex while it is absent at more caudal levels. (O, P) The E12.5 cortex lacks Gli3 protein while expression in the CGE, LGE and thalamus is not affected. Scale bars: 50µm (A, E); 200µm (I).

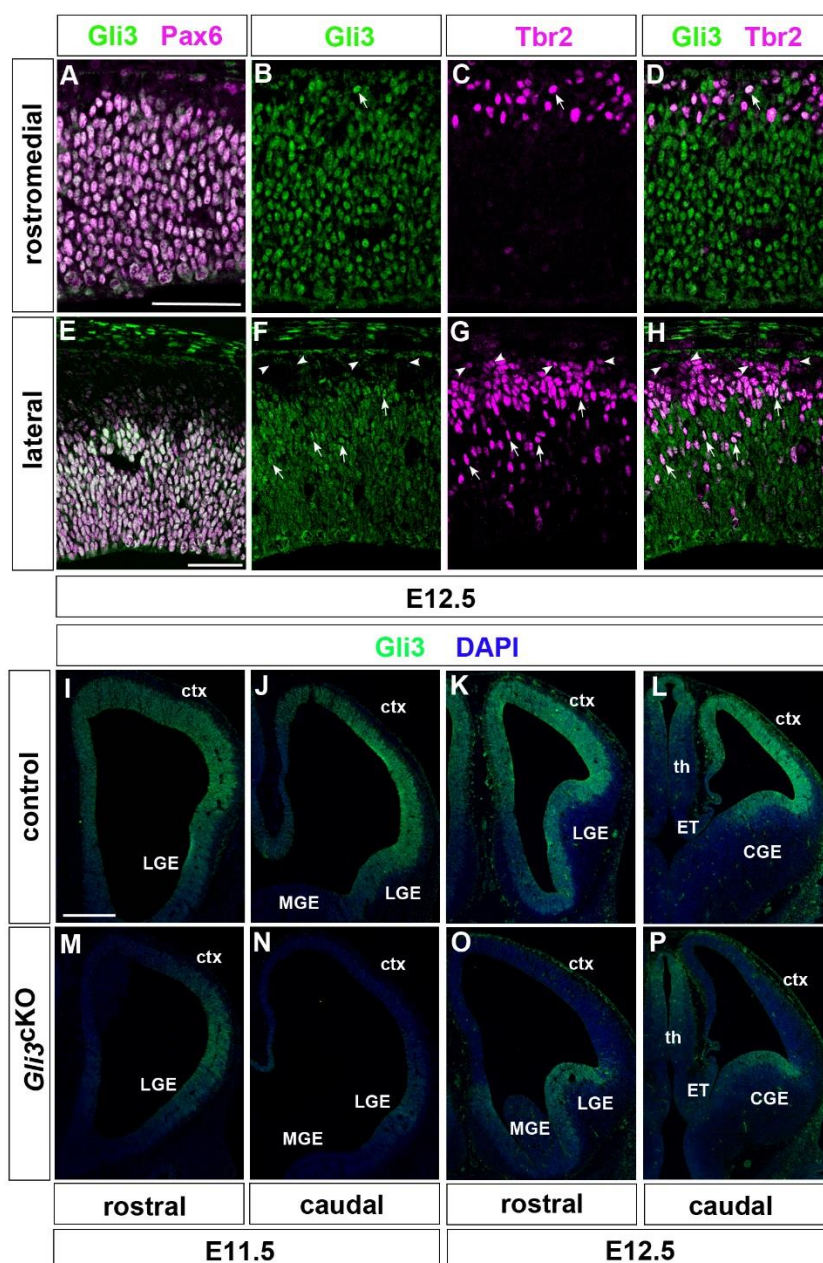

**Supplementary Figure 2: The rostral telencephalon is enlarged in E12.5 *Gli3*<sup>ckO</sup> embryos.** (A, B) Whole mount view of the embryonic heads of a control (A) and a *Gli3*<sup>ckO</sup> embryo (B). Arrows indicate the prominent bulging of the mutant forebrain. Scale bar: 1mm.

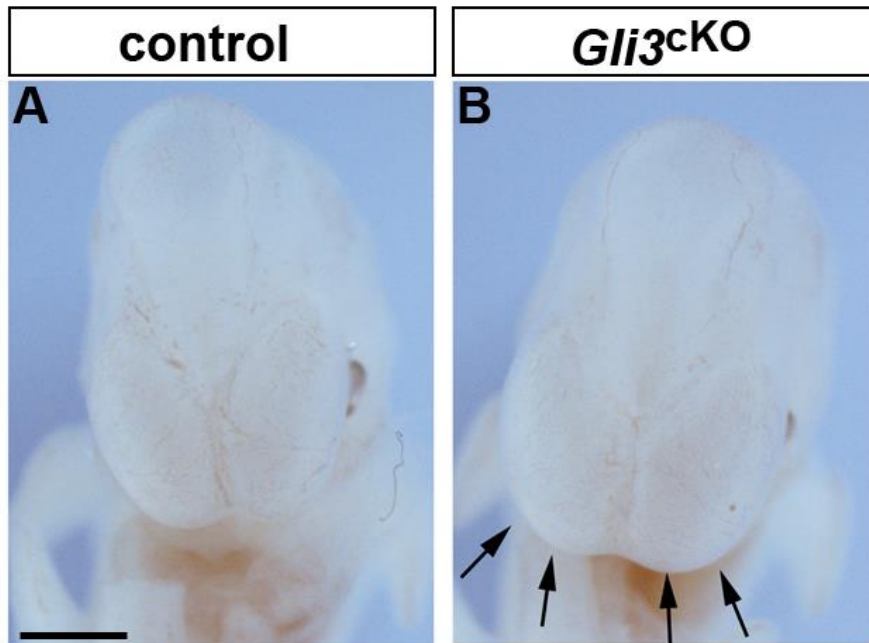

**Supplementary Figure 3: Morphological abnormalities in the rostromedial telencephalon of *Gli3<sup>ckKO</sup>* mutants.** (A, B) Coronal brain sections through the rostral telencephalon of E12.5 control (A) and *Gli3<sup>ckKO</sup>* (B) embryos stained with DAPI. The yellow line in (A) indicates the measurement of midline length. (C) Quantification of midline length. (D, E) Measurements of cell numbers in a 175  $\mu\text{m}$  wide box in E11.5 (D) and E12.5 (E) embryos. All statistical data is presented as means  $\pm$  95% CI; Mann Whitney tests; n = 6 (C); n=7 (D) and n=5 (E); \* p < 0.05; \*\* p < 0.01. ctx: cortex; LGE: lateral ganglionic eminence; sep: septum. Scale bar: 250  $\mu\text{m}$ .

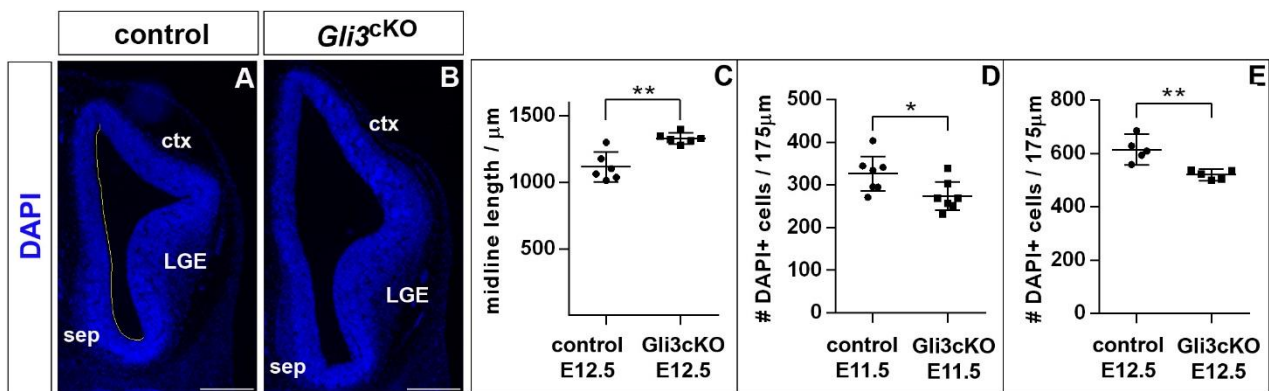

**Supplementary Figure 4: Enlarged ventricular surface in *Gli3*<sup>CKO</sup> mutants.** (A, B) Coronal sections through the brains of an E17.5 control and *Gli3*<sup>CKO</sup> embryo. Yellow lines indicate measurements of the dorsal telencephalic ventricular surface and cortical thickness. (C, D) Statistical evaluation of surface length (C) and thickness (D) measurements. All statistical data is presented as means  $\pm$  95% CI; Mann Whitney tests; n = 5; \* p < 0.05; \*\* p < 0.01. CC: corpus callosum; ctx: cortex; Pb: Probst bundle; sep: septum. Scale bar: 500  $\mu$ m.

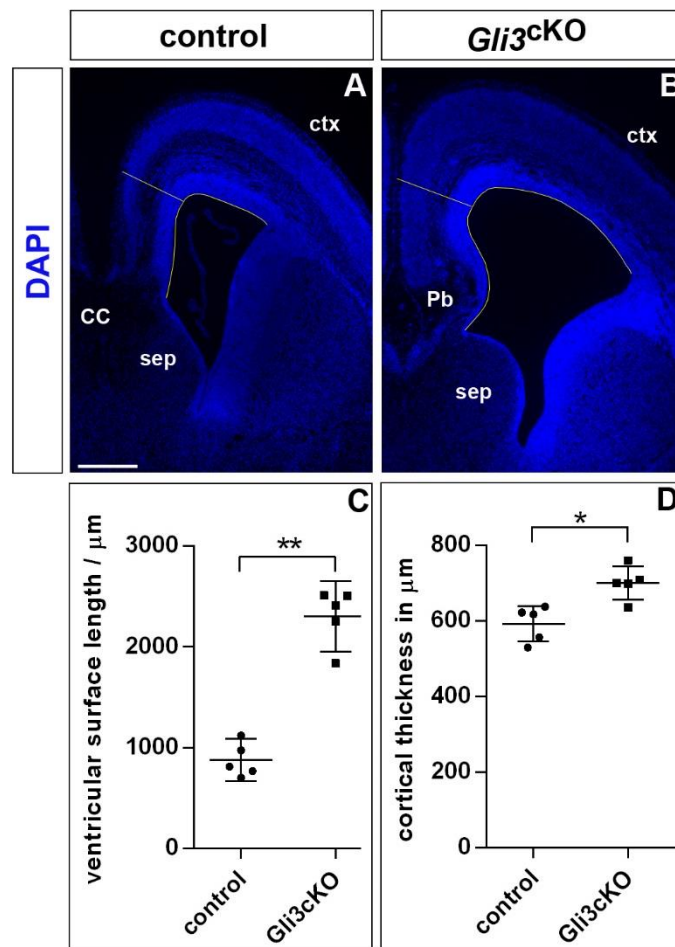



**Supplementary Figure 5: Numbers of cortical neurons in *Gli3*<sup>KO</sup> mutants.** Quantifications of Tbr1+ (A), Ctip2+ (B) and Satb2+ (C) neurons. All statistical data is presented as means  $\pm$  95% CI; Mann Whitney tests; n = 4; \* p < 0.05.

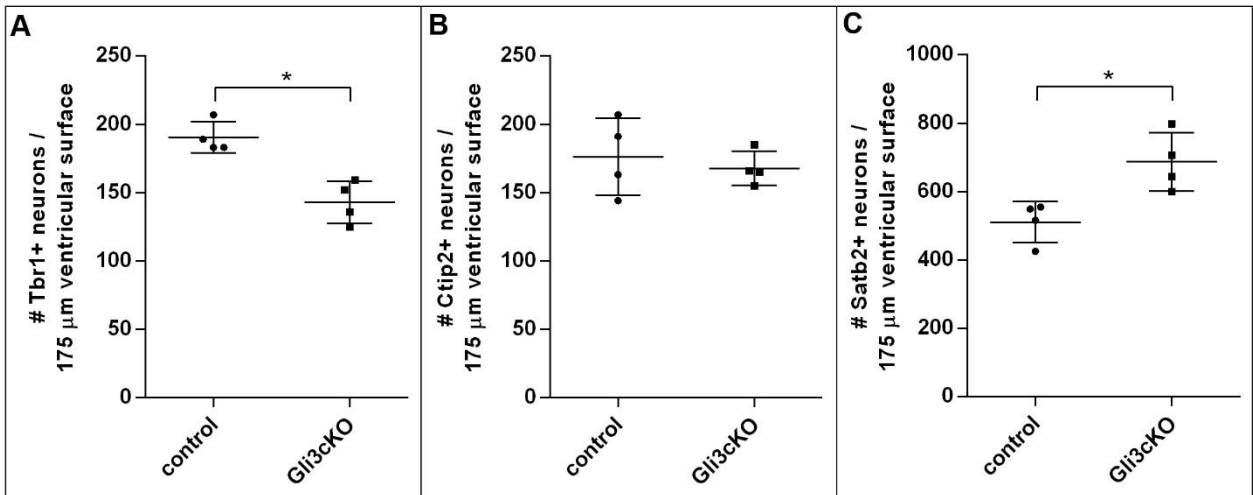

**Supplementary Figure 6: Gene ontology (GO) analysis** of genes differentially regulated in E11.5 (A) and E12.5 (B) cortical progenitor cells of *Emx1Cre;Gli3<sup>fl/fl</sup>* mutants. The X-axis values correspond to DAVID *p*-values. All terms reported have a false discovery rate (FDR) < 5%.

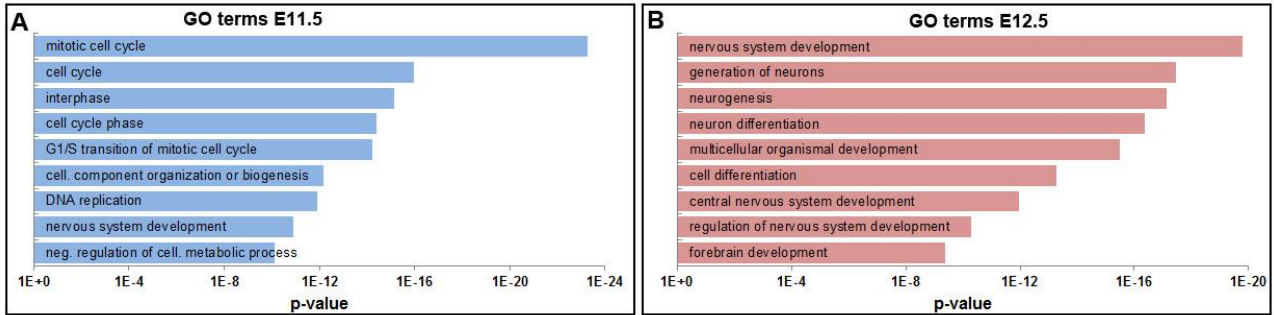

**Supplementary Figure 7: Proportion of proliferating vs differentiating in *Gli3<sup>ckO</sup>* mutants.** (A, B, E, F) Double immunostaining for Pax6 and GFP to distinguish proliferating (Pax6+GFP-) from differentiating (Pax6+GFP+) radial glial cells in *Gli3<sup>ckO</sup>* mutants positive for the *Tis21-GFP* transgene. (I) Quantification of the Pax6/GFP immunostainings. The proportion of proliferating radial glial cells is decreased in E12.5 *Gli3<sup>ckO</sup>* embryos (C, D, G, H) Coronal sections immunostained for Tbr2 and GFP showing proliferating (Tbr2+GFP-) and differentiating (Tbr2+GFP+) basal progenitors in *Gli3<sup>ckO</sup>* mutant, *Tis21-GFP*+ embryos. (J) Quantification revealed an increased proportion of differentiating basal progenitors in E11.5 *Gli3<sup>ckO</sup>* mutant embryos. All statistical data is presented as means  $\pm$  95% CI; Mann Whitney tests; n = 4 except for (C, D) where n=5; \* p < 0.05. Scale bars: 50  $\mu$ m.

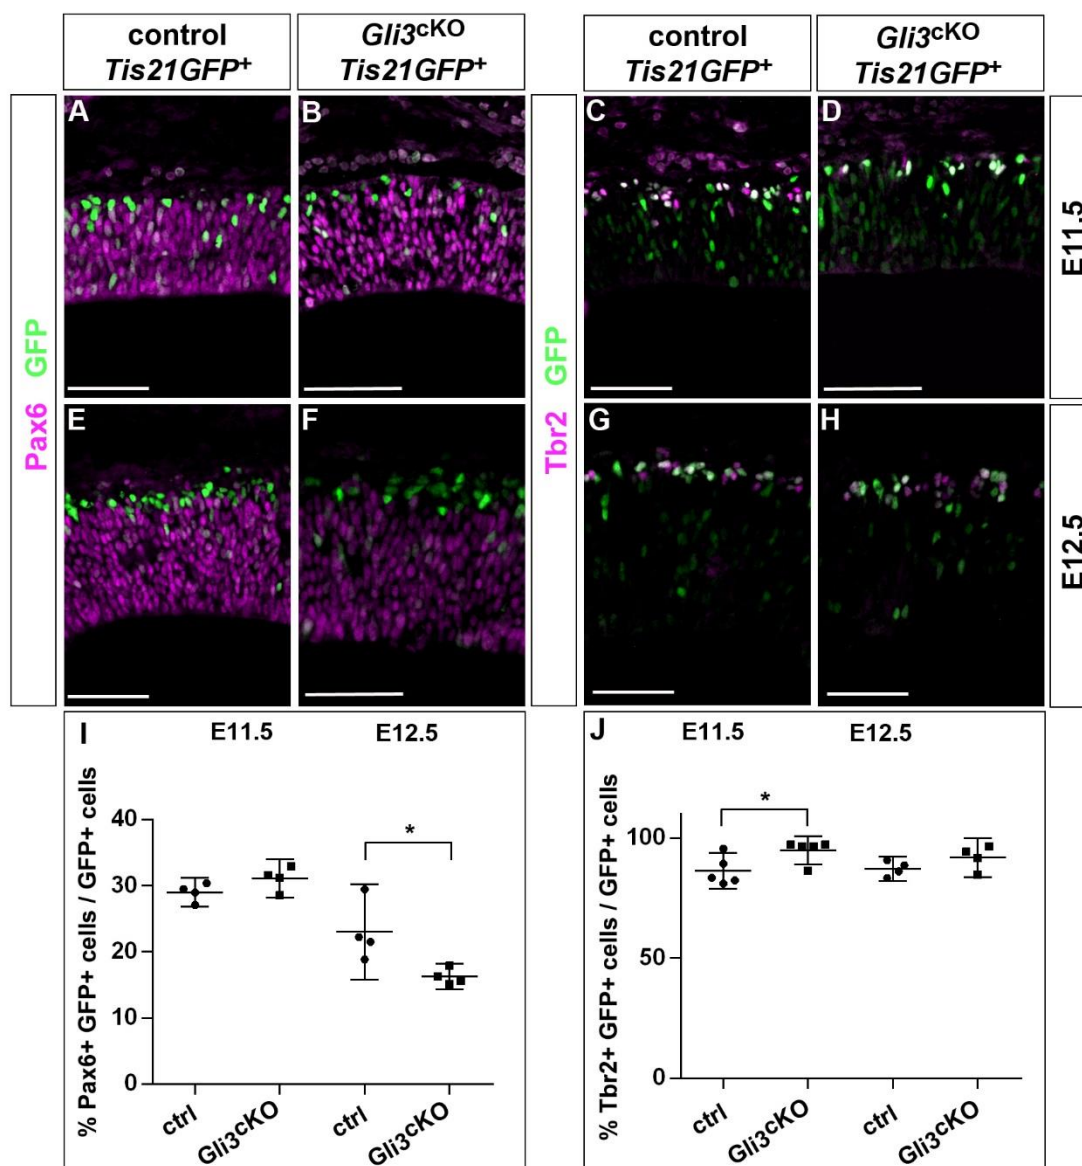

**Supplementary Figure 8: Neuron formation in the cortex of E12.5 *Gli3*<sup>ckO</sup> mutants after Palbociclib administration at E11.5.** (A-D) Immunohistochemistry for Tbr1 and BrdU revealing the proportions of newly formed neurons in E12.5 control and *Gli3*<sup>ckO</sup> embryos after BrdU and lactate or Palbociclib administration 24h earlier. Arrows indicate Tbr1+BrdU+ neurons (E) Quantifications of the immunostainings in (A-D). Statistical data is presented as means  $\pm$  95% CI; n = 5; \* p < 0.05; Kruskal-Wallis test with Dunn's multiple comparisons test. Scale bar: 50  $\mu$ m.

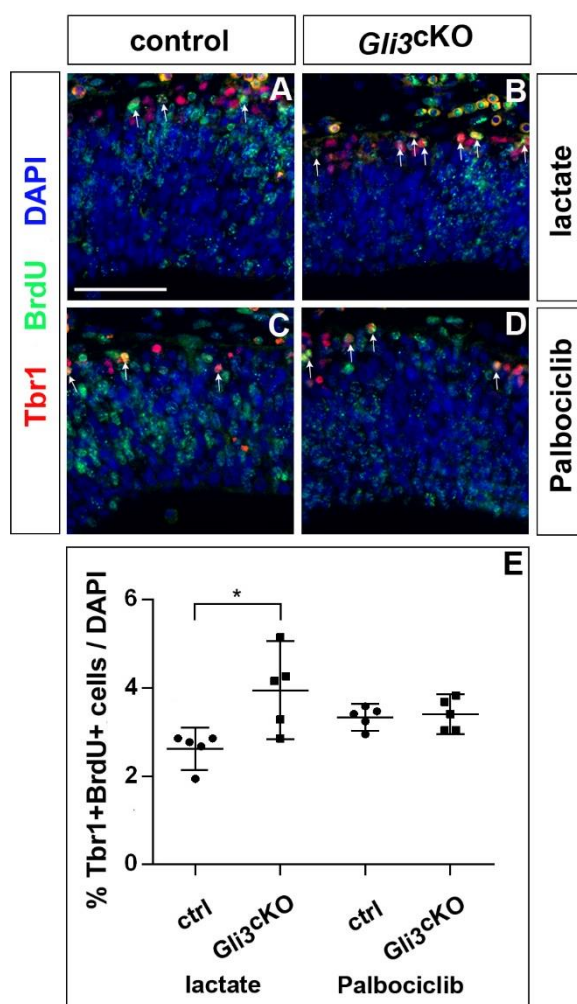

**Supplementary Table 1: Oligonucleotides used in this study**

| oligonucleotide                   | 5' - 3' sequence                | restriction site used for subcloning |
|-----------------------------------|---------------------------------|--------------------------------------|
| <b>EMSA</b>                       |                                 |                                      |
| Cdk_GliBS1_F                      | GACTCACGTGGGTGGGCTGAGGG         |                                      |
| Cdk_GliBS1_R                      | CCCCTCAGCCCACCCACGTGAGTC        |                                      |
| Cdk_GliBS1m_F                     | GACTCACGTGGGTATGCTGAGGG         |                                      |
| Cdk_GliBS1m_R                     | CCCCTCAGCATACCCACGTGAGTC        |                                      |
| Cdk_GliBS2_F                      | GGGGGGCTGTGTGGCCCCCTCGGAATC     |                                      |
| Cdk_GliBS2_R                      | GATTCCGAGGGGCCACACAGCCCCC       |                                      |
| Cdk_GliBS2_F                      | GGGGGGCTGTGTATCCCCTCGGAATC      |                                      |
| Cdk_GliBS2m_R                     | GATTCCGAGGGGATACACAGCCCCC       |                                      |
|                                   |                                 |                                      |
|                                   |                                 |                                      |
|                                   |                                 |                                      |
| <b>GST-Gli3_Zn finger cloning</b> |                                 |                                      |
| Gli3ZF_Fw                         | AAAGTCGACCAGGAGCCTGAAGTCATCTACG | Sall                                 |
| Gli3ZF_Rev                        | AAAGCGGCCGCGTCCCCACGCTGCTTCTTGG | NotI                                 |
|                                   |                                 |                                      |
|                                   |                                 |                                      |
| <b>Cdk6 promoter cloning</b>      |                                 |                                      |
| Cdk6_F1                           | AAAGGTACCCCGCCTCACCTGTCAACAC    | Asp718                               |
| Cdk6_R1                           | AAACTCGAGGCTGGCTTCAGGCTGCGGG    | XhoI                                 |
|                                   |                                 |                                      |
|                                   |                                 |                                      |
| <b>qRT-PCR</b>                    |                                 |                                      |
| CDK6_mRNA                         | ATGTTTCGCAGAAAGCCTCTT           |                                      |
| CDK6_mRNA                         | GTCCCTAGGCCAGTCTTCCT            |                                      |
| Actb_F                            | ACTATTGGCAACGAGCGGTT            |                                      |
| Actb_R                            | AGCACTGTGTTGGCATAGAGGT          |                                      |



**Supplementary Table 2: Antibodies used in this study**

| Antibody                      | Antigen                                                                                                    | Dilution  | Raised in | Source (Catalog #)        | Validation references |
|-------------------------------|------------------------------------------------------------------------------------------------------------|-----------|-----------|---------------------------|-----------------------|
| $\alpha$ -BrdU                | bromodeoxyuridine [BU1/75(CR1)]                                                                            | 01:50     | rabbit    | abcam (ab6326)            |                       |
| $\alpha$ -BrdU                | bromodeoxyuridine (clone B44)                                                                              | 01:50     | mouse     | Becton Dickinson (347580) |                       |
| $\alpha$ -Ctip2               | <i>H. sapiens</i> (aa1-150) [clone 25B6]                                                                   | 1:1000    | rat       | abcam (ab18465)           |                       |
| $\alpha$ -Flag                | synthetic peptide DYKDDDDK                                                                                 | 0.27mg/ml | mouse     | Sigma (F3165)             |                       |
| $\alpha$ -GFP                 | E. coli-derived recombinant full length protein corresponding to GFP                                       | 1:1000    | chicken   | abcam (ab13970)           |                       |
| $\alpha$ -Gli3                | E. coli-derived recombinant human GLI3 (aa1-479)                                                           | 1:200     | goat      | R&D Systems (AF3690)      | This work (Fig. S1)   |
| $\alpha$ -Pax6                | peptide:(QVPGSEPDMSQYWPRQLQ) derived from C-terminus of mouse Pax-6                                        | 1:400     | rabbit    | Biolegend (901301)        |                       |
| $\alpha$ -PCNA                | Protein A-rat PCNA fusion obtained from pC2T [PC10]                                                        | 1:500     | mouse     | abcam (ab29)              |                       |
| $\alpha$ -pHH3                | linear peptide corresponding to human Histone H3 at Ser10                                                  | 1:100     | rabbit    | Millipore (06-570)        |                       |
| $\alpha$ -Phospho-Rb (Ser780) | synthetic phosphopeptide corresponding to residues surrounding Ser780 of human Rb                          | 1:200     | rabbit    | Cell Signaling (9307)     |                       |
| $\alpha$ -Satb2               | recombinant fragment corresponding to Human SATB2 (C terminal)                                             | 1:200     | mouse     | Abcam (ab51502)           |                       |
| $\alpha$ -Tbr1                | synthetic peptide conjugated to KLH derived from within aa50-150 of mouse TBR1                             | 1:400     | rabbit    | abcam (ab31940)           |                       |
| $\alpha$ -Tbr2                | synthetic peptide conjugated to KLH derived from within residues 650 to the C-terminus of mouse TBR2/Eomes | 1:1000    | rabbit    | abcam (ab23345)           |                       |

**Supplementary Table 3: Differentially expressed genes in E11.5 and E12.5 *Gli3*<sup>CKO</sup> mutants.**

[Click here to Download Table S3](#)

**Supplementary Table 4: Summary of statistical analyses**

[Click here to Download Table S4](#)
